# Supplementary material for: Electronic and optical properties of metalloporphyrins of zinc on TiO2 cluster in dye-sensitized solar-cells (DSSC). A quantum chemistry study
Source: Royal Society of Chemistry journal article supplement (doi:10.1039/c7ra08648b), 2017-01-01
Supplement: c7ra08648b1.pdf [file c7ra08648b1.pdf]

## Electronic Supplementary information:

### Electronic and Optical Properties of Metalloporphyrins of Zinc on TiO<sub>2</sub> Cluster in Dye-sensitized Solar-Cells (DSSC). A Quantum Chemistry Study

Fernando Mendizabal, Raúl Mera-Adasme, Wen-Hua Xu and Dage Sundholm

#### 1.- Tables.

**Table S1.** Main geometric parameters of the LD13 and YD2-o-C8 ligands with different methods including gas and solvent effect (solv). Distances are given in pm and angles in degrees.

| Method           | System   | Zn-N  | N-C   | C-C1  | ZnNCC1° | C2-C3 | NCC1C2° | C5-O1 | C5-O2 | O2C5O1° |
|------------------|----------|-------|-------|-------|---------|-------|---------|-------|-------|---------|
| B3LYP            | LD13     | 204.8 | 137.9 | 140.8 | 3.48°   | 121.6 | 178.0°  | 123.4 | 138.4 | 121.1°  |
| CAM-B3LYP        | LD13     | 204.5 | 138.5 | 140.7 | 3.05°   | 121.3 | 178.2°  | 123.2 | 138.3 | 121.0°  |
| B3LYP (solv)     | LD13     | 205.1 | 137.8 | 140.9 | 3.49°   | 121.6 | 177.7°  | 123.9 | 137.5 | 121.4°  |
| CAM-B3LYP (solv) | LD13     | 204.8 | 138.4 | 141.0 | 3.12°   | 121.5 | 178.1°  | 123.9 | 136.8 | 121.1°  |
| B3LYP            | YD2-o-C8 | 204.5 | 138.5 | 140.6 | 3.15°   | 121.6 | 178.3°  | 123.5 | 138.5 | 121.1°  |
| CAM-B3LYP        | YD2-o-C8 | 204.3 | 138.1 | 140.2 | 2.75°   | 120.8 | 178.1°  | 122.9 | 138.2 | 121.3°  |
| B3LYP (solv)     | YD2-o-C8 | 204.5 | 138.6 | 141.0 | 4.65°   | 121.7 | 177.5°  | 124.0 | 137.2 | 121.4°  |
| CAM-B3LYP (solv) | YD2-o-C8 | 204.4 | 138.3 | 141.2 | 3.55°   | 121.5 | 177.2°  | 123.7 | 136.9 | 121.2°  |

**Table S2.** Main geometric parameters of the LD13 and YD2-o-C8 on [TiO<sub>2</sub>] cluster with different methods including gas and solvent effect (solv). Distances are given in pm and angles in degrees.

| Method           | System   | Zn-N  | N-C   | ZnNCC2° | NCC1C2° | Ti1-O1 | Ti2-O2 | C5-O2 | C5-O1O2C5O1° | Ti1O1C5 |        |
|------------------|----------|-------|-------|---------|---------|--------|--------|-------|--------------|---------|--------|
| B3LYP            | LD13     | 205.1 | 136.9 | 0.04°   | 179.4°  | 217.4  | 214.7  | 127.4 | 129.7        | 128.4°  | 134.9° |
| CAM-B3LYP        | LD13     | 205.3 | 136.6 | 0.06°   | 179.6°  | 217.2  | 214.5  | 127.7 | 129.4        | 129.1°  | 134.5° |
| B3LYP (solv)     | LD13     | 205.1 | 136.9 | 0.02°   | 179.5°  | 215.7  | 212.4  | 130.1 | 129.9        | 127.8°  | 135.1° |
| CAM-B3LYP (solv) | LD13     | 205.2 | 136.8 | 0.04°   | 179.3°  | 215.4  | 213.0  | 130.4 | 129.3        | 127.5°  | 135.2° |
| B3LYP            | YD2-o-C8 | 205.0 | 137.4 | 2.10°   | 177.7°  | 221.0  | 214.3  | 127.9 | 127.6        | 129.9°  | 133.6° |
| CAM-B3LYP        | YD2-o-C8 | 204.6 | 137.0 | 1.80°   | 178.3°  | 220.7  | 214.0  | 127.5 | 127.2        | 129.2°  | 133.2° |
| B3LYP (solv)     | YD2-o-C8 | 205.3 | 137.4 | 3.05°   | 177.3°  | 219.5  | 215.2  | 128.2 | 127.9        | 129.0°  | 133.9° |
| CAM-B3LYP (solv) | YD2-o-C8 | 204.8 | 136.9 | 2.45°   | 178.1°  | 219.1  | 214.8  | 128.0 | 127.2        | 128.6°  | 133.1° |

**Table S3.** Natural Population Analysis (NPA) charges (au) for the  $-\text{CO}_2^-$  group in LD13 attached to  $\text{TiO}_2$ , with both systems solvent phase at the B3LYP-D3 and CAM-B3LYP levels.

| System               | Method    | Zn     | C5     | O1     | O2     | Ti1    | Ti2    |
|----------------------|-----------|--------|--------|--------|--------|--------|--------|
| LD13- $\text{TiO}_2$ | B3LYP     | +1.597 | +0.873 | -0.676 | -0.676 | +1.462 | +1.459 |
|                      | CAM-B3LYP | +1.225 | +0.905 | -0.607 | -0.607 | +1.061 | +1.057 |
| LD13                 | B3LYP     | +1.599 | +0.815 | -0.638 | -0.713 |        |        |
|                      | CAM-B3LYP | +1.264 | +0.831 | -0.630 | -0.713 |        |        |
| $\text{TiO}_2$       | B3LYP     |        |        |        |        | +1.659 | +1.663 |
|                      | CAM-B3LYP |        |        |        |        | +1.350 | +1.352 |

**Table S4.** Natural Population Analysis (NPA) charges (au) for the  $-\text{CO}_2^-$  group in YD2-o-C8 attached to  $\text{TiO}_2$ , with both systems solvent phase at the B3LYP-D3 and CAM-B3LYP levels.

| System                   | Method    | Zn     | C5     | O1     | O2     | Ti1    | Ti2    |
|--------------------------|-----------|--------|--------|--------|--------|--------|--------|
| YD2-o-C8- $\text{TiO}_2$ | B3LYP     | +1.583 | +0.928 | -0.706 | -0.706 | +1.527 | +1.524 |
|                          | CAM-B3LYP | +1.284 | +0.894 | -0.628 | -0.628 | +1.031 | +1.023 |
| YD2-o-C8                 | B3LYP     | +1.589 | +0.818 | -0.649 | -0.714 |        |        |
|                          | CAM-B3LYP | +1.278 | +0.881 | -0.656 | -0.730 |        |        |
| $\text{TiO}_2$           | B3LYP     |        |        |        |        | +1.659 | +1.663 |
|                          | CAM-B3LYP |        |        |        |        | +1.350 | +1.352 |

2.- Wavelengths ( $\lambda$ ) and oscillator strengths ( $f$ ) for the UV/Vis spectra of the LD13 and YD2-o-C8 dyes calculated with TDDFT and the B3LYP, CAMB3LYP and BHHLYP density functionals. The ADC(2)-calculated spectra for LD13 is also given. All spectra were calculated in gas phase and with the COSMO solvation model (epsilon = 7.5, THF), without and with TiO<sub>2</sub> cluster. Wavelengths ( $\lambda$ ) are given in nm and oscillator strength ( $f$ ).

Table S5. LD13

| B3LYP (gas)  |       | B3LYP (solv) |       | CAM-B3LYP (gas) |       | CAM-B3LYP (solv) |       | BHHLYP (solv) |       |
|--------------|-------|--------------|-------|-----------------|-------|------------------|-------|---------------|-------|
| $\lambda$ nm | $f$   | $\lambda$ nm | $f$   | $\lambda$ nm    | $f$   | $\lambda$ nm     | $f$   | $\lambda$ nm  | $f$   |
| 615          | 0.771 | 631.9        | 0.955 | 597             | 0.567 | 615              | 0.774 | 557           | 0.563 |
| 580          | 0.064 | 582.2        | 0.099 | 562             | 0.001 | 565              | 0.002 | 538           | 0.003 |
| 430          | 0.678 | 438.3        | 1.115 | 384             | 2.222 | 400              | 1.731 | 361           | 3.661 |
| 427          | 0.953 | 433.9        | 0.949 | 383             | 1.476 | 397              | 2.312 | 346           | 0.088 |
| 410          | 0.052 | 415.7        | 0.031 | 343             | 0.016 | 353              | 0.001 | 341           | 2.305 |
| 406          | 0.712 | 412.1        | 0.447 | 312             | 0.055 | 350              | 0.015 | 318           | 0.076 |
| 398          | 0.477 | 405.5        | 0.521 | 294             | 0.188 | 314              | 0.053 | 315           | 0.005 |
| 379          | 0.001 | 384.0        | 0.004 |                 |       | 305              | 0.002 | 311           | 0.066 |
| 378          | 0.097 | 379.8        | 0.001 |                 |       | 298              | 0.001 | 305           | 0.012 |
| 370          | 0.001 | 374.7        | 0.007 |                 |       | 295              | 0.264 | 309           | 0.014 |
| 365          | 0.106 | 372.1        | 0.002 |                 |       |                  |       |               |       |
| 364          | 0.014 | 367.6        | 0.023 |                 |       |                  |       |               |       |
| 356          | 0.027 | 360.0        | 0.113 |                 |       |                  |       |               |       |
| 340          | 0.013 | 352.1        | 0.051 |                 |       |                  |       |               |       |
| 332          | 0.070 | 344.4        | 0.036 |                 |       |                  |       |               |       |
| 321          | 0.020 | 342.9        | 0.036 |                 |       |                  |       |               |       |
| 315          | 0.164 | 334.8        | 0.052 |                 |       |                  |       |               |       |
| 304          | 0.026 | 319.7        | 0.127 |                 |       |                  |       |               |       |
| 300          | 0.011 | 302.9        | 0.020 |                 |       |                  |       |               |       |
|              |       | 302.5        | 0.002 |                 |       |                  |       |               |       |
|              |       | 301.6        | 0.055 |                 |       |                  |       |               |       |

| ADC(2) (gas) |       | ADC(2) (solv) |       |
|--------------|-------|---------------|-------|
| $\lambda$ nm | $f$   | $\lambda$ nm  | $f$   |
| 603          | 0.248 | 612           | 0.318 |
| 582          | 0.004 | 583           | 0.007 |
| 386          | 2.992 | 401           | 2.955 |
| 381          | 2.045 | 398           | 2.135 |
| 355          | 0.001 | 357           | 0.000 |
| 348          | 0.004 | 350           | 0.002 |
| 338          | 0.025 | 346           | 0.021 |



Table S7. YD2-o-C8

| B3LYP<br>(gas) |       | B3LYP<br>(solv) |       | CAM-B3LYP<br>(gas) |       | CAM-B3LYP<br>(solv) |       | BHHLYP<br>(solv) |       |
|----------------|-------|-----------------|-------|--------------------|-------|---------------------|-------|------------------|-------|
| $\lambda$ /nm  | $f$   | $\lambda$ /nm   | $f$   | $\lambda$ /nm      | $f$   | $\lambda$ /nm       | $f$   | $\lambda$ /nm    | $f$   |
| 640            | 0.349 | 690             | 0.392 | 595                | 0.232 | 605                 | 0.329 | 549              | 0.258 |
| 533            | 0.065 | 613             | 0.020 | 576                | 0.001 | 579                 | 0.001 | 533              | 0.003 |
| 498            | 0.053 | 545             | 0.142 | 428                | 0.413 | 446                 | 0.355 | 453              | 0.089 |
| 430            | 0.010 | 519             | 0.042 | 387                | 1.126 | 412                 | 1.219 | 403              | 0.279 |
| 425            | 0.257 | 443             | 0.637 | 392                | 1.530 | 404                 | 1.802 | 359              | 3.102 |
| 411            | 0.398 | 442             | 0.419 | 350                | 0.175 | 361                 | 0.279 | 334              | 1.394 |
| 408            | 0.442 | 425             | 0.086 | 328                | 0.005 | 336                 | 0.005 | 337              | 0.005 |
| 389            | 0.275 | 424             | 0.457 | 320                | 0.026 | 324                 | 0.046 | 319              | 0.026 |
| 379            | 0.027 | 419             | 0.557 | 317                | 0.039 | 320                 | 0.008 | 311              | 0.028 |
| 368            | 0.031 | 404             | 0.390 | 312                | 0.020 | 318                 | 0.027 | 308              | 0.001 |
| 363            | 0.145 | 393             | 0.159 | 312                | 0.085 | 316                 | 0.024 |                  |       |
| 361            | 0.112 | 388             | 0.048 | 310                | 0.013 | 313                 | 0.068 |                  |       |
| 359            | 0.021 | 370             | 0.021 | 305                | 0.011 | 311                 | 0.019 |                  |       |
| 356            | 0.018 | 367             | 0.010 | 303                | 0.027 | 308                 | 0.027 |                  |       |
| 352            | 0.035 | 366             | 0.027 |                    |       | 303                 | 0.043 |                  |       |
| 337            | 0.016 | 364             | 0.025 |                    |       |                     |       |                  |       |
| 336            | 0.064 | 361             | 0.048 |                    |       |                     |       |                  |       |
| 335            | 0.105 | 360             | 0.092 |                    |       |                     |       |                  |       |
| 322            | 0.026 | 356             | 0.029 |                    |       |                     |       |                  |       |
| 317            | 0.011 | 350             | 0.026 |                    |       |                     |       |                  |       |
| 313            | 0.095 | 349             | 0.051 |                    |       |                     |       |                  |       |
| 310            | 0.010 | 348             | 0.021 |                    |       |                     |       |                  |       |
| 309            | 0.067 | 342             | 0.026 |                    |       |                     |       |                  |       |
| 308            | 0.049 | 339             | 0.016 |                    |       |                     |       |                  |       |
|                |       | 334             | 0.053 |                    |       |                     |       |                  |       |
|                |       | 331             | 0.015 |                    |       |                     |       |                  |       |
|                |       | 318             | 0.129 |                    |       |                     |       |                  |       |
|                |       | 311             | 0.154 |                    |       |                     |       |                  |       |

Table S8. YD2-o-C8-TiO<sub>2</sub>

| B3LYP<br>(gas) |          | B3LYP<br>(solv) |          | CAM-B3LYP<br>(gas) |          | CAM-B3LYP<br>(solv) |          | BHHLYP<br>(solv) |          |
|----------------|----------|-----------------|----------|--------------------|----------|---------------------|----------|------------------|----------|
| $\lambda$ nm   | <i>f</i> | $\lambda$ nm    | <i>f</i> | $\lambda$ nm       | <i>f</i> | $\lambda$ nm        | <i>f</i> | $\lambda$ nm     | <i>f</i> |
| 610            | 0.422    | 621             | 0.532    | 595                | 0.447    | 611                 | 0.560    | 557              | 0.381    |
| 588            | 0.006    | 603             | 0.017    | 567                | 0.021    | 565                 | 0.010    | 537              | 0.001    |
| 510            | 0.025    | 529             | 0.034    | 402                | 0.447    | 439                 | 0.128    | 536              | 0.001    |
| 481            | 0.021    | 489             | 0.021    | 400                | 0.005    | 404                 | 1.079    | 404              | 0.286    |
| 468            | 0.001    | 484             | 0.001    | 394                | 0.004    | 393                 | 2.200    |                  |          |
| 456            | 0.011    | 468             | 0.001    | 391                | 1.587    | 360                 | 0.007    |                  |          |
| 415            | 0.648    | 466             | 0.001    | 386                | 1.116    | 358                 | 0.006    |                  |          |
| 400            | 0.010    | 456             | 0.011    | 384                | 0.004    | 356                 | 0.328    |                  |          |
| 396            | 0.046    | 456             | 0.002    | 378                | 0.003    | 349                 | 0.005    |                  |          |
| 381            | 0.002    | 454             | 0.774    | 376                | 0.002    | 347                 | 0.005    |                  |          |
| 376            | 0.003    | 447.4           | 0.009    | 373                | 0.004    | 342                 | 0.005    |                  |          |
| 370            | 0.015    | 447.2           | 0.446    | 370                | 0.002    | 338.8               | 0.007    |                  |          |
| 365            | 0.322    | 446.9           | 0.004    | 366                | 0.002    | 338.8               | 0.017    |                  |          |
|                |          | 443.4           | 0.002    | 365                | 0.002    | 336                 | 0.011    |                  |          |
|                |          | 443.3           | 0.021    | 353                | 0.005    | 335                 | 0.011    |                  |          |
|                |          | 443             | 0.357    | 346                | 0.028    | 331                 | 0.006    |                  |          |
|                |          | 441             | 0.022    | 344                | 0.007    | 330                 | 0.006    |                  |          |
|                |          | 437             | 0.063    | 342                | 0.004    | 322                 | 0.003    |                  |          |
|                |          | 436             | 0.003    | 341                | 0.006    | 321                 | 0.015    |                  |          |
|                |          | 435             | 0.002    | 341                | 0.006    | 320                 | 0.046    |                  |          |
|                |          | 429             | 0.001    | 339                | 0.004    | 316.9               | 0.009    |                  |          |
|                |          |                 |          | 338                | 0.002    | 316.7               | 0.004    |                  |          |
|                |          |                 |          |                    |          | 316.1               | 0.021    |                  |          |

**3.- Table S9.** The strongest singlet excitation energies calculated for LD13 and YD2-o-C8 in THF are compared to experimental data [14,34]. The excitation energies and oscillator strengths have been calculated at the TDDFT/B3LYP level using COSMO with  $\epsilon=7.6$ . All calculated excitation energies are reported as supplementary information. The orbital contributions and the character of the transitions are also given.

| System   | $\lambda_{\text{calc}}$ | $\lambda_{\text{exp}}$ | $f^a$ | Contribution <sup>b</sup>                                                                                                        | Transition type                                                                                                                                       |
|----------|-------------------------|------------------------|-------|----------------------------------------------------------------------------------------------------------------------------------|-------------------------------------------------------------------------------------------------------------------------------------------------------|
| LD13     | 632 (Q)                 | 672                    | 0.955 | 195a $\rightarrow$ 196a (89%)                                                                                                    | MLMLCT (dxz/dyz+ $\pi \rightarrow \pi^*$ +dxz)                                                                                                        |
|          | 438 (B)                 | 458                    | 1.156 | 194a $\rightarrow$ 196a (56%)<br>195a $\rightarrow$ 197a (28%)                                                                   | LMLCT ( $\pi \rightarrow \pi^*$ +dxz)<br>MLMLCT (dxz/dyz+ $\pi \rightarrow \pi^*$ +dxz)                                                               |
|          | 434 (B)                 |                        | 0.950 | 195a $\rightarrow$ 198a (43%)<br>194a $\rightarrow$ 197a (35%)                                                                   | MLLCT (dxz/dyz+ $\pi \rightarrow \pi^*$ )<br>LLMCT ( $\pi \rightarrow \pi^*$ +dxz)                                                                    |
| YD2-o-C8 | 690 (Q)                 | 645                    | 0.392 | 295a $\rightarrow$ 296a (93%)                                                                                                    | MLLCT (dxz/dyz+ $\pi \rightarrow \pi^*$ )                                                                                                             |
|          | 545 (T)                 | 581                    | 0.149 | 294a $\rightarrow$ 296a (78%)                                                                                                    | MLLCT (dxz/dyz+ $\pi \rightarrow \pi^*$ )                                                                                                             |
|          | 443 (B)                 | 448                    | 0.637 | 295a $\rightarrow$ 298a (41%)<br>292a $\rightarrow$ 296a (19%)<br>293a $\rightarrow$ 297a (15%)                                  | MLLCT (dxz/dyz+ $\pi \rightarrow \pi^*$ )<br>LLCT ( $\pi \rightarrow \pi^*$ )<br>LLCT ( $\pi \rightarrow \pi^*$ )                                     |
|          | 419 (B)                 |                        | 0.557 | 294a $\rightarrow$ 297a (19%)<br>291a $\rightarrow$ 296a (18%)<br>292a $\rightarrow$ 296a (17%)<br>293a $\rightarrow$ 296a (17%) | MLLCT (dxz/dyz+ $\pi \rightarrow \pi^*$ )<br>LLCT ( $\pi \rightarrow \pi^*$ )<br>LLCT ( $\pi \rightarrow \pi^*$ )<br>LLCT ( $\pi \rightarrow \pi^*$ ) |

<sup>a</sup>Oscillator strength.

<sup>b</sup>The reported values are  $|\text{coefficient}|^2 \times 100\%$ .

**LD13.** The electronic structure of this model is described with the three absorption peaks as mentioned above. The electronic transitions are assigned to individual states as ligand-to-ligand, metal-ligand-to-ligand, metal-ligand-to-metal-ligand and ligand-to-ligand-metal charge transfer (LLCT, MLLCT, MLML and LLMCT). The theoretical calculations given in Table S9 show good agreement with the experimental results [22]. In general, the bands are a mixture of excitations. The Q band is formed by the transition at 632 nm. This transition is mainly composed of 195a  $\rightarrow$  196a (dxz/dyz+ $\pi \rightarrow \pi^*$ +dxz) (HOMO-LUMO). This band corresponds to MLMLCT. The frontier MOs are shown in Figure 7. The 195a (HOMO) has a porphyrin  $\pi$  and  $d$  orbitals of zinc character, while the arrival orbital 196a (LUMO) shows a main composition centered on the porphyrin, adjacent substituents and same dxz orbital of zinc. Both orbitals have a predominant  $\pi$  character.

The B band is formed by two transitions, the one at 438 nm is composed mainly of 194a  $\rightarrow$  196a ( $\pi \rightarrow \pi^*$ +dxz) of the LMLCT type. The 194a (HOMO-1) contains a dominant contribution of the porphyrinic ring. The second transition at 434 nm has a main

contribution from a  $195a \rightarrow 198a$  ( $dxz/dyz+\pi \rightarrow \pi^*$ ) excitation which is associated with MLLCT.

**YD2-o-C8.** The electronic structure of the model is described with the three absorption peaks which were mentioned above. The electronic transitions are assigned to individual states as ligand-to-ligand and metal-ligand-to-ligand charge transfers (LLCT and MLLCT), respectively. The theoretical results, given in Table 3, show good agreement with the experimental data [14]. Some of the bands are a mixture of excitations. Band Q is formed by a transition at 690 nm is composed mainly of  $295a \rightarrow 296a$  ( $dxz/dyz+\pi \rightarrow \pi^*$ ), corresponding to a HOMO-LUMO transition. This band corresponds to MLLCT. The frontier MOs are shown in Figure 9. The 295a (HOMO) has a porphyrin  $\pi$  character and Zn atom shows a  $dxz/dyz$  contributions, while the arrival orbitals 296a (LUMO) shows a main composition centered on the porphyrin and phenylethynyl carboxylic acid.

The T band is formed by a transition at 545 nm, and it shows a principal component  $294a \rightarrow 296a$  ( $dxz/dyz+\pi \rightarrow \pi^*$ ) of the MLLCT type. We point out that the 294a orbital corresponds to a  $\pi$  orbital of the porphyrin ring and  $d$  orbitals from the Zn atom. Thus, in the transition involved this orbital goes to the 296a orbital, which is centered mainly on the porphyrin and phenylethynyl carboxylic acid. Finally, the B band is formed by multiple transitions, being the two main transitions at 443 nm:  $295a \rightarrow 298a$  ( $dxz/dyz+\pi \rightarrow \pi^*$ ) of the MLLCT type. The 235a (HOMO) has mixtures of the MOs of Zn orbitals, diarylamino, and a lower contribution of phenylethynyl carboxylic acid, while the 298a MO (LUMO+2) contains a principal contribution of phenylethynyl carboxylic acid with porphyrin. The second transition at 419 nm has a principal  $294a \rightarrow 297a$  ( $dx^2-y^2+\pi \rightarrow \pi^*$ ) excitation which is associated with MLLCT. These results are very similar to those reported previously for YD2 [33].



4.- Calculated B3LYP electronic spectra of LD13 in solvent.

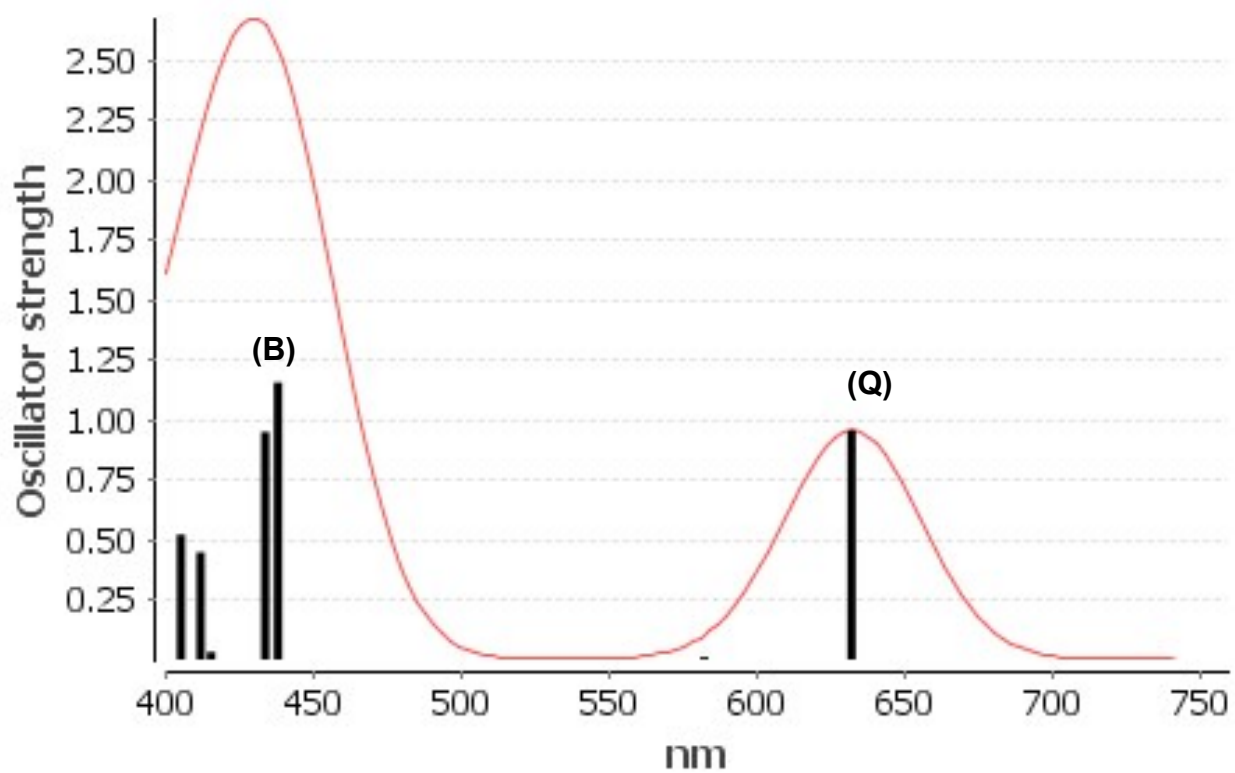

Figure S1.

5.- Calculated B3LYP electronic spectra of YD2-o-C8 in solvent.

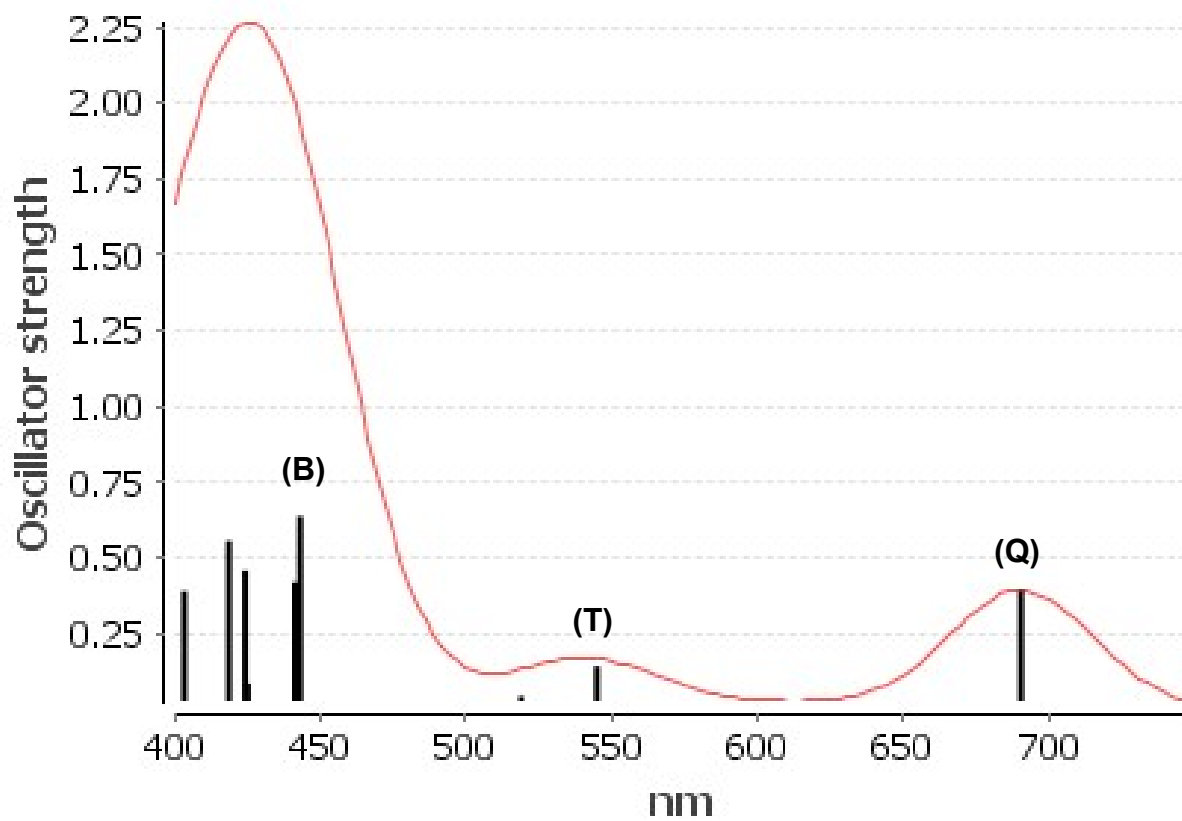

Figure S2.

6.- Most important active molecular orbitals in the electronic transitions of LD13 models at the B3LYP level in solvent.

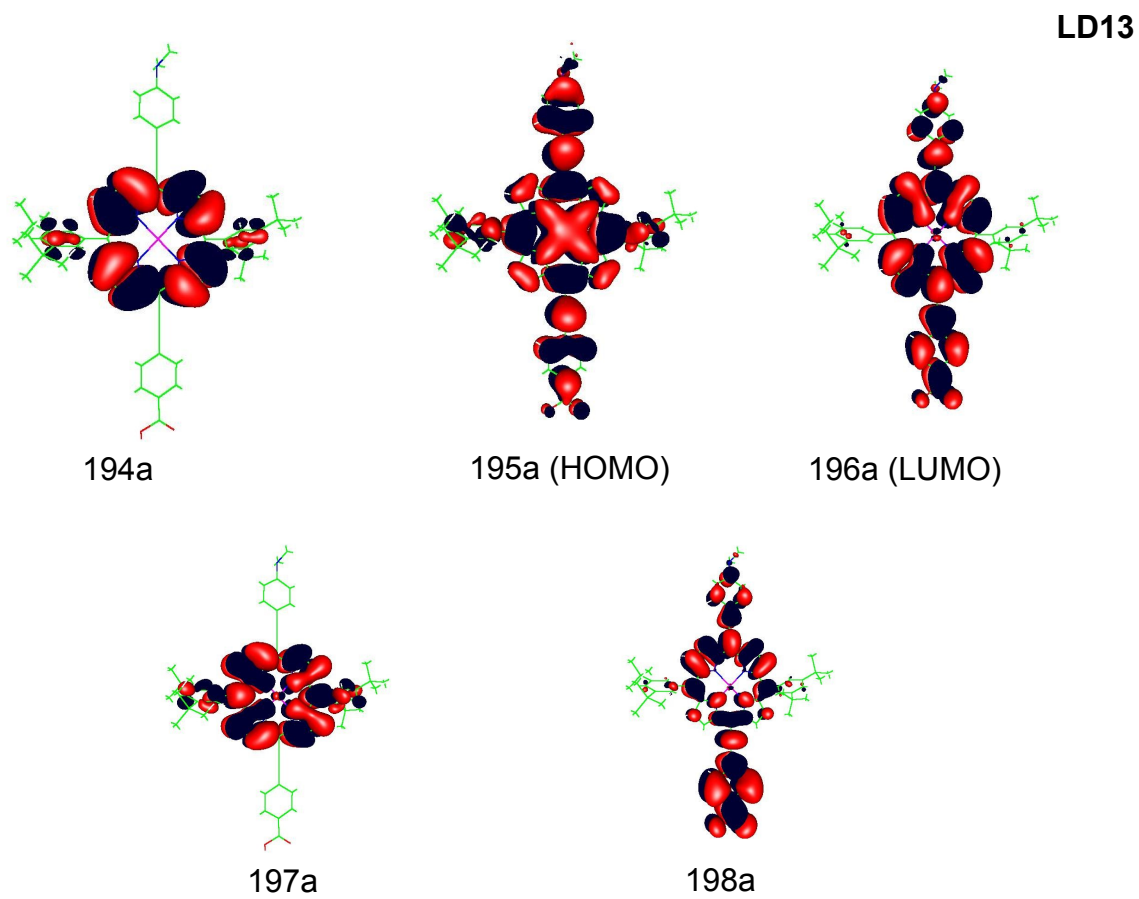

Figure S3.

7.- Most important active molecular orbitals in the electronic transitions of YD2-o-C8 models at the B3LYP level in solvent.

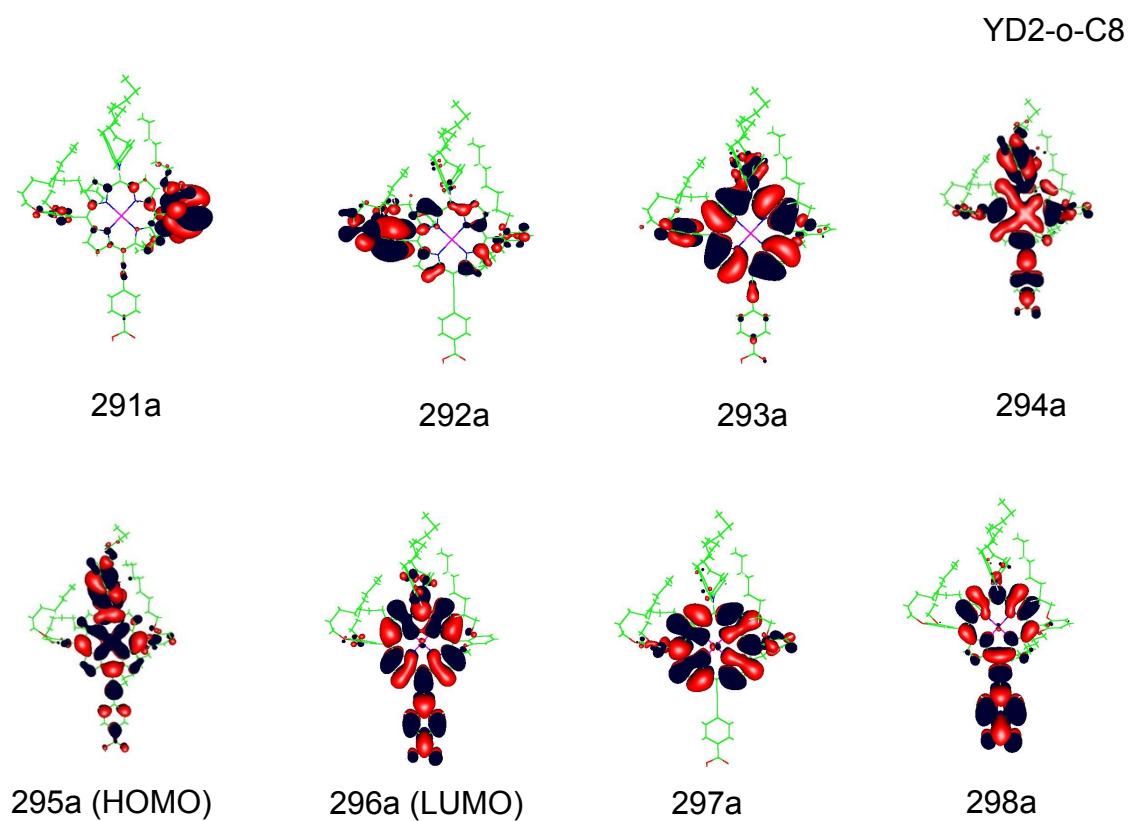

Figure S4.

8- Frontier Orbitals on TiO<sub>2</sub> cluster in system LD13-TiO<sub>2</sub> at the B3LYP level.

LD13-TiO<sub>2</sub>

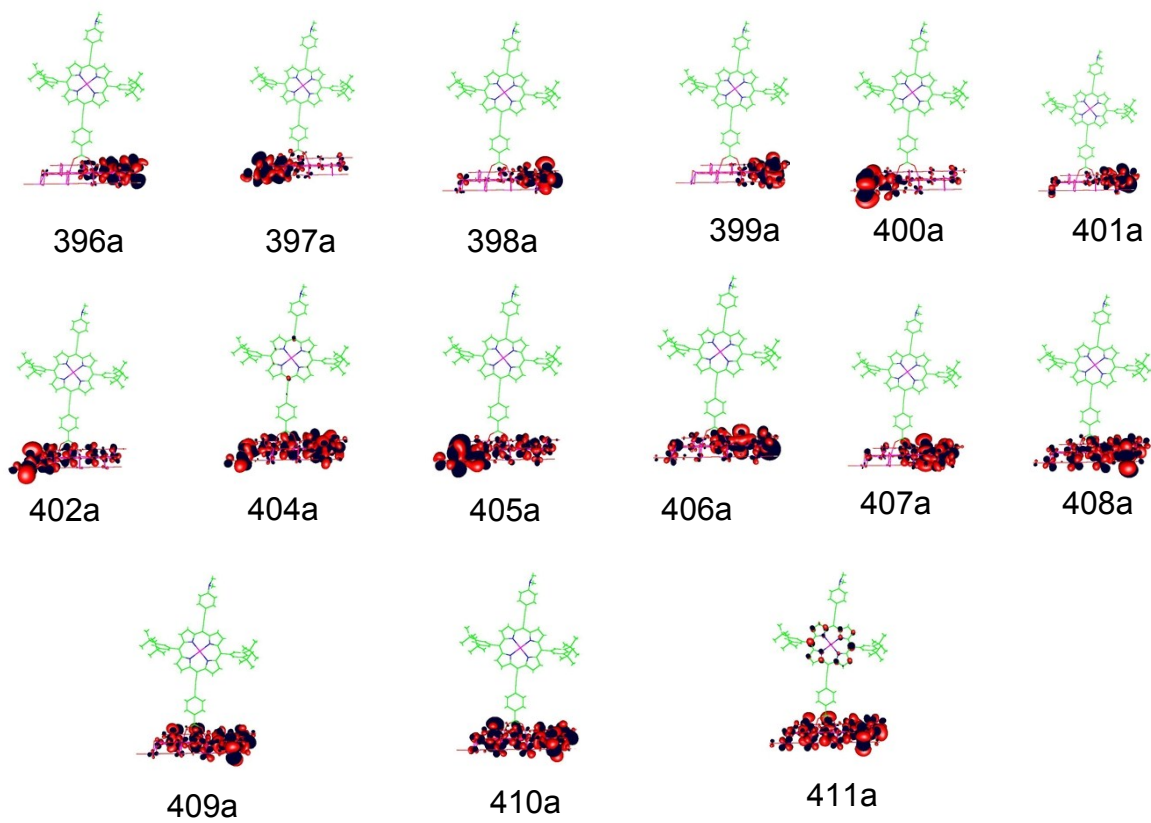

Figure S5.

9.- Frontier Orbitals on TiO<sub>2</sub> cluster in system YD2-o-C8-TiO<sub>2</sub> at the B3LYP level.

YD2-o-C8-TiO<sub>2</sub>

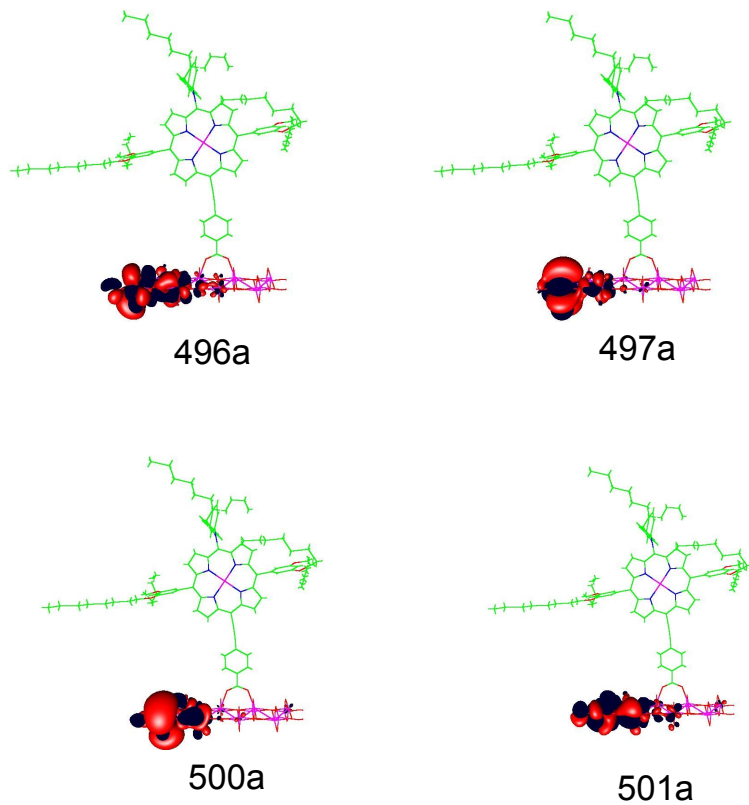

Figure S6.

**10.- Cartesian coordinates (in Angstroms) for the optimized geometries of the systems studied in this work at the B3LYP level.**

**Tables S10. LD13 (Gas)**

140

|    |            |            |            |
|----|------------|------------|------------|
| Zn | -0.0462490 | -0.3751564 | -2.0134178 |
| C  | -2.0275466 | 1.9191687  | -2.5393842 |
| C  | -2.1838199 | 3.1278728  | -3.3076582 |
| C  | -1.0242844 | 3.3233274  | -3.9956108 |
| C  | -0.1289060 | 2.2416834  | -3.6514547 |
| N  | -0.7750689 | 1.3871979  | -2.7642840 |
| H  | -3.0771449 | 3.7390734  | -3.3223863 |
| H  | -0.7965223 | 4.1247426  | -4.6860174 |
| C  | -2.0964058 | -1.7388710 | -0.1531081 |
| C  | -3.4034597 | -1.5253106 | 0.4255462  |
| C  | -3.8880350 | -0.3573140 | -0.0807690 |
| C  | -2.8859450 | 0.1723265  | -0.9701064 |
| N  | -1.7988637 | -0.6760417 | -0.9996920 |
| H  | -3.8832140 | -2.1825793 | 1.1386837  |
| H  | -4.8376459 | 0.1165633  | 0.1323543  |
| C  | 1.9191167  | -2.6923879 | -1.5222461 |
| C  | 2.0266745  | -3.9627373 | -0.8535369 |
| C  | 0.8606060  | -4.1646084 | -0.1770933 |
| C  | 0.0199748  | -3.0134201 | -0.4116727 |
| N  | 0.6885302  | -2.1290368 | -1.2486510 |
| H  | 0.5864955  | -5.0234790 | 0.4209903  |
| C  | 2.0198232  | 1.0084589  | -3.8390792 |
| C  | 3.3804601  | 0.8667712  | -4.3035991 |
| C  | 3.8626106  | -0.3053784 | -3.8024643 |
| C  | 2.8138599  | -0.8977820 | -3.0142037 |
| N  | 1.6999225  | -0.0819570 | -3.0398564 |
| H  | 3.9038646  | 1.5805050  | -4.9258203 |
| H  | 4.8473107  | -0.7330843 | -3.9414274 |
| C  | 2.9236496  | -2.1237027 | -2.3290222 |
| C  | 1.1715222  | 2.0825841  | -4.1422946 |
| C  | -1.2666281 | -2.8330075 | 0.1139798  |
| C  | -3.0123919 | 1.3756044  | -1.6919575 |
| C  | 1.6971353  | 3.1388778  | -5.0566245 |
| C  | 1.8735524  | 4.4466247  | -4.5985636 |
| C  | 2.3575611  | 5.4527074  | -5.4397787 |
| C  | 2.6758024  | 5.1091763  | -6.7596512 |
| C  | 2.5181864  | 3.8073091  | -7.2510910 |
| C  | 2.0188287  | 2.8334792  | -6.3811205 |
| H  | 3.0559817  | 5.8752053  | -7.4225534 |
| C  | -1.7911219 | -3.8883163 | 1.0301908  |
| C  | -1.1795061 | -4.1109521 | 2.2672743  |
| C  | -1.6539150 | -5.0958137 | 3.1376770  |
| C  | -2.7640773 | -5.8454025 | 2.7318209  |
| C  | -3.4045943 | -5.6464080 | 1.5030930  |
| C  | -2.8972581 | -4.6569792 | 0.6568876  |
| C  | -4.2228103 | 2.0928312  | -1.5502448 |
| C  | -5.2659945 | 2.7034012  | -1.4157380 |
| C  | -6.4784082 | 3.4085342  | -1.2492714 |
| C  | -7.5014894 | 2.8928350  | -0.4260901 |
| C  | -8.6904981 | 3.5846490  | -0.2575624 |
| C  | -8.8914273 | 4.8104176  | -0.9065718 |
| C  | -7.8812356 | 5.3304510  | -1.7276839 |
| C  | -6.6916654 | 4.6427614  | -1.8986672 |
| H  | -7.3476280 | 1.9413101  | 0.0788186  |

|   |             |            |             |
|---|-------------|------------|-------------|
| H | -9.4741458  | 3.1824148  | 0.3783455   |
| H | -8.0502082  | 6.2827509  | -2.2255803  |
| H | -5.9096749  | 5.0505136  | -2.5357571  |
| C | -10.1316526 | 5.5799232  | -0.7576648  |
| O | -10.3766983 | 6.6631228  | -1.2963811  |
| O | -11.0529278 | 4.9686960  | 0.0751855   |
| H | -11.8624074 | 5.5309530  | 0.1361640   |
| H | -0.3271877  | -3.4927574 | 2.5311778   |
| H | -3.3488075  | -4.4622380 | -0.3109180  |
| H | 1.8699731   | 1.8118212  | -6.7239888  |
| H | 1.6238170   | 4.6666333  | -3.5627311  |
| C | 2.8736798   | 3.4157723  | -8.6955375  |
| C | 2.5132994   | 6.8818204  | -4.8925913  |
| C | 1.1291641   | 7.4046592  | -4.4381529  |
| H | 0.6928976   | 6.7724151  | -3.6501418  |
| H | 1.2183384   | 8.4281440  | -4.0386781  |
| H | 0.4245769   | 7.4252078  | -5.2848996  |
| C | 3.0728450   | 7.8555417  | -5.9458426  |
| H | 2.4098876   | 7.9351355  | -6.8207574  |
| H | 3.1669393   | 8.8607193  | -5.5066982  |
| H | 4.0710997   | 7.5481464  | -6.2929646  |
| C | 3.4805167   | 6.8713539  | -3.6850819  |
| H | 3.1085705   | 6.2343848  | -2.8689669  |
| H | 4.4716236   | 6.4952453  | -3.9838786  |
| H | 3.6035572   | 7.8914783  | -3.2859282  |
| C | 1.6106207   | 2.8803890  | -9.4110438  |
| H | 1.1986981   | 1.9952204  | -8.9041485  |
| H | 0.8236635   | 3.6505826  | -9.4402589  |
| H | 1.8519968   | 2.5936233  | -10.4476678 |
| C | 3.4183563   | 4.6051171  | -9.5082529  |
| H | 4.3377857   | 5.0149769  | -9.0631094  |
| H | 3.6615801   | 4.2738781  | -10.5296704 |
| H | 2.6788859   | 5.4166141  | -9.5890722  |
| C | 3.9583037   | 2.3120627  | -8.6721834  |
| H | 3.6120770   | 1.4103794  | -8.1449183  |
| H | 4.2277127   | 2.0180978  | -9.6998878  |
| H | 4.8684647   | 2.6725366  | -8.1669663  |
| C | -1.0014582  | -5.3798907 | 4.5009086   |
| C | -4.6251573  | -6.5057432 | 1.1337330   |
| C | -5.1921704  | -6.1470172 | -0.2521070  |
| H | -5.5242192  | -5.0985143 | -0.2975109  |
| H | -4.4516770  | -6.3110954 | -1.0494265  |
| H | -6.0642462  | -6.7825011 | -0.4709685  |
| C | -5.7416540  | -6.2862489 | 2.1824632   |
| H | -6.0473586  | -5.2284346 | 2.2092731   |
| H | -6.6258392  | -6.8954581 | 1.9326370   |
| H | -5.4132185  | -6.5689371 | 3.1940105   |
| C | -4.2205102  | -7.9988555 | 1.1177693   |
| H | -3.8527022  | -8.3329578 | 2.0996589   |
| H | -5.0865599  | -8.6269167 | 0.8512997   |
| H | -3.4238722  | -8.1778753 | 0.3786731   |
| H | -3.1452255  | -6.6155685 | 3.3994755   |
| C | -2.0444222  | -5.1820227 | 5.6262208   |
| H | -2.9031401  | -5.8609342 | 5.5126585   |
| H | -1.5870597  | -5.3803468 | 6.6093457   |
| H | -2.4271922  | -4.1494882 | 5.6246075   |
| C | -0.4880399  | -6.8394961 | 4.5257727   |
| H | -0.0148732  | -7.0622469 | 5.4962639   |
| H | -1.3045466  | -7.5617469 | 4.3747642   |
| H | 0.2579058   | -7.0023518 | 3.7319271   |
| C | 0.1906829   | -4.4471758 | 4.7816986   |



|   |            |            |            |
|---|------------|------------|------------|
| H | 0.9862426  | -4.5651093 | 4.0300059  |
| H | -0.1152706 | -3.3901038 | 4.7994680  |
| H | 0.6245930  | -4.6858855 | 5.7651537  |
| H | 2.8866175  | -4.6181903 | -0.9077656 |
| C | 4.1373949  | -2.8387650 | -2.4658116 |
| C | 5.1819899  | -3.4475515 | -2.5937853 |
| C | 6.4016784  | -4.1482597 | -2.7546168 |
| C | 7.4042634  | -3.6543140 | -3.6134336 |
| C | 6.6418697  | -5.3523468 | -2.0645630 |
| H | 5.8762656  | -5.7445365 | -1.3973896 |
| C | 7.8414089  | -6.0341326 | -2.2301815 |
| H | 8.0356055  | -6.9645541 | -1.7012416 |
| C | 8.8319869  | -5.5405465 | -3.0822333 |
| H | 7.2307945  | -2.7250963 | -4.1538917 |
| C | 8.5992085  | -4.3435567 | -3.7713013 |
| H | 9.3655953  | -3.9508012 | -4.4384700 |
| N | 10.0622628 | -6.2712334 | -3.2288607 |
| C | 11.2475587 | -5.6214380 | -2.6660662 |
| H | 12.0709892 | -6.3504823 | -2.6135314 |
| H | 11.6017823 | -4.7490838 | -3.2606710 |
| H | 11.0294772 | -5.2749157 | -1.6465872 |
| C | 10.2740586 | -6.8867867 | -4.5401562 |
| H | 11.1100249 | -7.6004581 | -4.4746291 |
| H | 9.3726958  | -7.4392060 | -4.8393992 |
| H | 10.5137239 | -6.1533623 | -5.3425850 |

**Table S11. LD13 (solv)**

140

|    |            |            |            |
|----|------------|------------|------------|
| Zn | -0.0456722 | -0.3749025 | -2.0140009 |
| C  | -2.0272008 | 1.9221613  | -2.5397010 |
| C  | -2.1838244 | 3.1323437  | -3.3073782 |
| C  | -1.0231773 | 3.3279127  | -3.9954053 |
| C  | -0.1275673 | 2.2453199  | -3.6520823 |
| N  | -0.7742717 | 1.3906746  | -2.7646454 |
| H  | -3.0750911 | 3.7473889  | -3.3237143 |
| H  | -0.7974499 | 4.1323378  | -4.6831241 |
| C  | -2.0978319 | -1.7412661 | -0.1533846 |
| C  | -3.4060235 | -1.5282303 | 0.4245974  |
| C  | -3.8914046 | -0.3593199 | -0.0816131 |
| C  | -2.8879392 | 0.1710635  | -0.9705647 |
| N  | -1.8008051 | -0.6777077 | -1.0001976 |
| H  | -3.8896565 | -2.1850386 | 1.1356833  |
| H  | -4.8432872 | 0.1103921  | 0.1332079  |
| C  | 1.9217862  | -2.6933208 | -1.5211820 |
| C  | 2.0306744  | -3.9639536 | -0.8513928 |
| C  | 0.8641493  | -4.1657434 | -0.1738018 |
| C  | 0.0222509  | -3.0148290 | -0.4091603 |
| N  | 0.6909650  | -2.1302596 | -1.2466117 |
| H  | 0.5952317  | -5.0250189 | 0.4264596  |
| C  | 2.0220288  | 1.0092672  | -3.8429090 |
| C  | 3.3828716  | 0.8669486  | -4.3086753 |
| C  | 3.8657404  | -0.3059066 | -3.8070911 |
| C  | 2.8165003  | -0.8976731 | -3.0175490 |
| N  | 1.7024047  | -0.0816234 | -3.0435153 |
| H  | 3.9084587  | 1.5769667  | -4.9335963 |
| H  | 4.8513536  | -0.7311747 | -3.9501935 |
| C  | 2.9255727  | -2.1237853 | -2.3301751 |
| C  | 1.1731413  | 2.0849797  | -4.1445304 |
| C  | -1.2662766 | -2.8350191 | 0.1151653  |
| C  | -3.0125451 | 1.3760034  | -1.6923764 |
| C  | 1.6986526  | 3.1413399  | -5.0588902 |

|   |             |            |             |
|---|-------------|------------|-------------|
| C | 1.8735721   | 4.4493777  | -4.5997849  |
| C | 2.3585740   | 5.4554498  | -5.4413389  |
| C | 2.6775755   | 5.1113025  | -6.7617173  |
| C | 2.5202691   | 3.8087359  | -7.2534999  |
| C | 2.0212124   | 2.8342252  | -6.3832510  |
| H | 3.0580391   | 5.8773067  | -7.4246768  |
| C | -1.7908115  | -3.8905700 | 1.0313179   |
| C | -1.1776169  | -4.1135458 | 2.2680104   |
| C | -1.6534655  | -5.0979262 | 3.1390904   |
| C | -2.7648500  | -5.8472062 | 2.7333524   |
| C | -3.4058004  | -5.6476306 | 1.5040848   |
| C | -2.8984155  | -4.6576974 | 0.6575386   |
| C | -4.2231700  | 2.0938067  | -1.5508008  |
| C | -5.2661053  | 2.7055362  | -1.4169122  |
| C | -6.4793242  | 3.4109321  | -1.2501669  |
| C | -7.5007146  | 2.8928722  | -0.4258281  |
| C | -8.6902568  | 3.5847886  | -0.2571922  |
| C | -8.8924020  | 4.8112811  | -0.9065139  |
| C | -7.8823216  | 5.3321226  | -1.7284393  |
| C | -6.6916926  | 4.6451518  | -1.9004995  |
| H | -7.3491460  | 1.9419333  | 0.0805095   |
| H | -9.4693086  | 3.1765889  | 0.3802603   |
| H | -8.0444465  | 6.2836860  | -2.2296001  |
| H | -5.9123135  | 5.0558323  | -2.5386828  |
| C | -10.1352486 | 5.5769589  | -0.7545365  |
| O | -10.3766829 | 6.6640044  | -1.2978096  |
| O | -11.0510308 | 4.9706868  | 0.0722114   |
| H | -11.8714640 | 5.5174625  | 0.1467286   |
| H | -0.3236534  | -3.4976805 | 2.5327281   |
| H | -3.3521137  | -4.4629727 | -0.3094295  |
| H | 1.8743906   | 1.8125602  | -6.7272792  |
| H | 1.6228125   | 4.6713374  | -3.5644695  |
| C | 2.8759484   | 3.4171130  | -8.6978407  |
| C | 2.5141688   | 6.8846073  | -4.8943564  |
| C | 1.1297820   | 7.4069400  | -4.4396213  |
| H | 0.6952061   | 6.7753078  | -3.6499526  |
| H | 1.2207005   | 8.4306890  | -4.0414135  |
| H | 0.4249642   | 7.4273100  | -5.2864156  |
| C | 3.0741332   | 7.8575086  | -5.9479672  |
| H | 2.4111158   | 7.9366996  | -6.8229336  |
| H | 3.1677898   | 8.8622915  | -5.5079113  |
| H | 4.0723465   | 7.5494675  | -6.2948229  |
| C | 3.4806229   | 6.8731947  | -3.6860107  |
| H | 3.1066340   | 6.2367894  | -2.8700453  |
| H | 4.4724380   | 6.4981708  | -3.9850167  |
| H | 3.6025353   | 7.8937470  | -3.2878983  |
| C | 1.6125891   | 2.8805857  | -9.4124818  |
| H | 1.2028200   | 1.9941694  | -8.9054552  |
| H | 0.8256453   | 3.6512556  | -9.4428275  |
| H | 1.8554328   | 2.5944513  | -10.4488246 |
| C | 3.4199391   | 4.6069452  | -9.5100920  |
| H | 4.3394958   | 5.0166672  | -9.0649695  |
| H | 3.6623850   | 4.2747364  | -10.5313180 |
| H | 2.6801102   | 5.4182981  | -9.5901347  |
| C | 3.9602174   | 2.3129218  | -8.6736294  |
| H | 3.6121057   | 1.4109627  | -8.1477706  |
| H | 4.2290061   | 2.0205195  | -9.7018225  |
| H | 4.8704874   | 2.6732474  | -8.1681458  |
| C | -1.0010838  | -5.3819197 | 4.5023482   |
| C | -4.6268700  | -6.5062313 | 1.1347737   |
| C | -5.1938762  | -6.1469438 | -0.2508934  |

|   |            |            |            |
|---|------------|------------|------------|
| H | -5.5268437 | -5.0985193 | -0.2951108 |
| H | -4.4530350 | -6.3102545 | -1.0483001 |
| H | -6.0653993 | -6.7834934 | -0.4686312 |
| C | -5.7425002 | -6.2866571 | 2.1845949  |
| H | -6.0487119 | -5.2286851 | 2.2108751  |
| H | -6.6260781 | -6.8960368 | 1.9333826  |
| H | -5.4132211 | -6.5717448 | 3.1952851  |
| C | -4.2224162 | -7.9995704 | 1.1197391  |
| H | -3.8553618 | -8.3326897 | 2.1023204  |
| H | -5.0898726 | -8.6258923 | 0.8541817  |
| H | -3.4270953 | -8.1796437 | 0.3789622  |
| H | -3.1464071 | -6.6170952 | 3.4011247  |
| C | -2.0447782 | -5.1845215 | 5.6273086  |
| H | -2.9027883 | -5.8643031 | 5.5129539  |
| H | -1.5862820 | -5.3840295 | 6.6095764  |
| H | -2.4261151 | -4.1510704 | 5.6272032  |
| C | -0.4889013 | -6.8420861 | 4.5267412  |
| H | -0.0160373 | -7.0633250 | 5.4976192  |
| H | -1.3068995 | -7.5631307 | 4.3773283  |
| H | 0.2578359  | -7.0048296 | 3.7332370  |
| C | 0.1911249  | -4.4492647 | 4.7828944  |
| H | 0.9868620  | -4.5683879 | 4.0313986  |
| H | -0.1148343 | -3.3919802 | 4.8000807  |
| H | 0.6235976  | -4.6887479 | 5.7667451  |
| H | 2.8896463  | -4.6216246 | -0.9025178 |
| C | 4.1394976  | -2.8392888 | -2.4668251 |
| C | 5.1837929  | -3.4497135 | -2.5935962 |
| C | 6.4024157  | -4.1548176 | -2.7507980 |
| C | 7.4084554  | -3.6634974 | -3.6083132 |
| C | 6.6350367  | -5.3593616 | -2.0577286 |
| H | 5.8678273  | -5.7502589 | -1.3916841 |
| C | 7.8338151  | -6.0452879 | -2.2198957 |
| H | 8.0186942  | -6.9754669 | -1.6868801 |
| C | 8.8281066  | -5.5551740 | -3.0704171 |
| H | 7.2428805  | -2.7343208 | -4.1513713 |
| C | 8.6018865  | -4.3574696 | -3.7622590 |
| H | 9.3690922  | -3.9655354 | -4.4283575 |
| N | 10.0584834 | -6.2912637 | -3.2132047 |
| C | 11.2439773 | -5.6129045 | -2.6702638 |
| H | 12.0829149 | -6.3243538 | -2.6362663 |
| H | 11.5641051 | -4.7355770 | -3.2739668 |
| H | 11.0381304 | -5.2706700 | -1.6466652 |
| C | 10.2713105 | -6.8782291 | -4.5437075 |
| H | 11.1207335 | -7.5765581 | -4.4975834 |
| H | 9.3772028  | -7.4396242 | -4.8483406 |
| H | 10.4927085 | -6.1220640 | -5.3280262 |

**Table S12. LD13-TiO2 (gas)**

193

|    |            |           |            |
|----|------------|-----------|------------|
| Ti | 7.8633895  | 5.3962343 | 14.2455952 |
| Ti | 4.3243172  | 5.1736184 | 12.9235313 |
| Ti | 0.7852422  | 4.9511021 | 11.6014578 |
| Ti | -2.7538300 | 4.7284862 | 10.2793939 |
| O  | 7.1643089  | 5.5481449 | 16.0914262 |
| O  | 3.6252339  | 5.3256285 | 14.7693527 |
| O  | 0.0861616  | 5.1030126 | 13.4472889 |
| O  | -3.4529107 | 4.8803967 | 12.1252250 |
| O  | 6.2348045  | 5.2542881 | 13.2125448 |
| O  | 2.6956360  | 5.0317658 | 11.8904364 |
| O  | -0.8434362 | 4.8091499 | 10.5683725 |

|    |            |            |            |
|----|------------|------------|------------|
| O  | -4.3825112 | 4.5866335  | 9.2462990  |
| Ti | 3.4678864  | 9.5992735  | 19.8878385 |
| Ti | -0.0712793 | 9.3766517  | 18.5657397 |
| Ti | -3.6103543 | 9.1541353  | 17.2436662 |
| Ti | -7.1494266 | 8.9315194  | 15.9216024 |
| Ti | 4.3608377  | 7.5333287  | 17.8451771 |
| Ti | 0.8216692  | 7.3108063  | 16.5230686 |
| Ti | -2.7174031 | 7.0881904  | 15.2010047 |
| Ti | -6.2564781 | 6.8656740  | 13.8789312 |
| Ti | 3.4312371  | 7.2395654  | 14.9662511 |
| Ti | 6.9703121  | 7.4620818  | 16.2883246 |
| Ti | -0.1078351 | 7.0169495  | 13.6441872 |
| Ti | -3.6469101 | 6.7944332  | 12.3221137 |
| O  | 4.1669317  | 9.4473711  | 18.0421007 |
| O  | 0.6277660  | 9.2247492  | 16.7200019 |
| O  | -2.9113063 | 9.0021333  | 15.3979380 |
| O  | -6.4503813 | 8.7796169  | 14.0758645 |
| O  | 5.0964388  | 9.7411283  | 20.9209917 |
| O  | 1.5573638  | 9.5186119  | 19.5989182 |
| O  | -1.9817085 | 9.2959961  | 18.2768544 |
| O  | -5.5207834 | 9.0734797  | 16.9547808 |
| O  | -9.0598557 | 8.8508638  | 15.6327170 |
| O  | 5.0599183  | 7.3814181  | 15.9993460 |
| O  | 1.5207498  | 7.1588958  | 14.6772375 |
| O  | -2.0183224 | 6.9362799  | 13.3551737 |
| O  | -5.5573974 | 6.7137635  | 12.0331002 |
| O  | 3.6617897  | 7.6853306  | 19.6909053 |
| O  | 0.1226239  | 7.4627088  | 18.3688065 |
| O  | -3.4164484 | 7.2400929  | 17.0467426 |
| O  | -6.9555233 | 7.0175765  | 15.7246691 |
| O  | 2.7321918  | 7.3914679  | 16.8119889 |
| O  | 6.2712668  | 7.6139843  | 18.1340624 |
| O  | -0.8068804 | 7.1688520  | 15.4899251 |
| O  | -4.3459554 | 6.9463356  | 14.1678515 |
| O  | 7.6693574  | 7.3101794  | 14.4425867 |
| O  | 4.1302824  | 7.0876630  | 13.1205132 |
| O  | 0.5912102  | 6.8650471  | 11.7984493 |
| O  | -2.9478621 | 6.6424312  | 10.4763855 |
| H  | 6.0448758  | 9.7811735  | 21.0644459 |
| H  | -9.8683787 | 8.7804536  | 15.1198318 |
| O  | 9.7737833  | 5.4768980  | 14.5345738 |
| H  | 10.5821775 | 5.5473103  | 15.0475172 |
| H  | -5.3308901 | 4.5466024  | 9.1029730  |
| O  | 0.6058086  | 9.0320724  | 13.4473572 |
| O  | 2.7916545  | 9.1907592  | 14.2535322 |
| C  | 1.6864830  | 9.6705838  | 13.7745370 |
| C  | 1.6424806  | 11.1497375 | 13.5618543 |
| C  | 0.4883884  | 11.7359749 | 13.0244877 |
| C  | 2.7479539  | 11.9482592 | 13.8822885 |
| C  | 0.4464343  | 13.1009416 | 12.7846160 |
| H  | -0.3608824 | 11.0949249 | 12.7949388 |
| C  | 2.7138632  | 13.3168637 | 13.6447562 |
| H  | 3.6274411  | 11.4683506 | 14.3094688 |
| C  | 1.5645960  | 13.9121009 | 13.0805120 |
| H  | -0.4461803 | 13.5570486 | 12.3538509 |
| H  | 3.5781855  | 13.9385777 | 13.8821793 |
| C  | 1.5161113  | 15.2965616 | 12.7888537 |
| C  | 1.4242827  | 16.4747605 | 12.4949928 |
| C  | 1.2698878  | 17.8285533 | 12.1163492 |
| C  | 2.3596761  | 18.7100122 | 12.3369979 |
| C  | 0.0279324  | 18.1965691 | 11.5335649 |

|    |            |            |            |
|----|------------|------------|------------|
| C  | -2.0713056 | 18.0184938 | 10.7389735 |
| C  | 3.6251984  | 20.5126631 | 12.4010675 |
| C  | 4.3934773  | 19.4368106 | 12.9723077 |
| C  | 3.6090221  | 18.3208802 | 12.9309395 |
| N  | 2.3852802  | 20.0419848 | 12.0213982 |
| C  | -1.5893583 | 19.3680063 | 10.6038045 |
| N  | -0.3045669 | 19.4503945 | 11.0973585 |
| C  | -2.3245432 | 20.4270093 | 10.0484725 |
| C  | 4.0833116  | 21.8311648 | 12.2606468 |
| C  | -1.8666696 | 21.7467358 | 9.9027872  |
| C  | 3.3504024  | 22.8954399 | 11.7043041 |
| H  | -3.0594516 | 17.6721462 | 10.4264711 |
| H  | 3.8453798  | 17.3100951 | 13.2717301 |
| H  | 5.4120254  | 19.5312043 | 13.3568097 |
| C  | -1.0683882 | 17.2932697 | 11.3144668 |
| H  | -1.0614507 | 16.2318865 | 11.5714819 |
| N  | -0.6284050 | 22.2059916 | 10.2824096 |
| N  | 2.0681428  | 22.8024419 | 11.2132141 |
| C  | 1.7170116  | 24.0442287 | 10.7656981 |
| C  | 0.4973306  | 24.3864108 | 10.1924237 |
| C  | 2.8207555  | 24.9763303 | 10.9780139 |
| C  | 3.8300965  | 24.2378605 | 11.5648409 |
| Zn | 0.8780018  | 21.1225124 | 11.1528704 |
| C  | -2.6291890 | 22.8292461 | 9.3303683  |
| C  | -0.5880984 | 23.5410340 | 9.9677064  |
| C  | -1.8351022 | 23.9391934 | 9.3715544  |
| H  | -3.6482569 | 22.7403833 | 8.9457249  |
| H  | -2.0686628 | 24.9511408 | 9.0268829  |
| H  | 4.8145369  | 24.5970993 | 11.8704333 |
| C  | 5.4590528  | 22.1504882 | 12.7404421 |
| C  | 5.6551158  | 22.6043163 | 14.0476596 |
| C  | 6.5494225  | 22.0422948 | 11.8727669 |
| C  | 6.9269239  | 22.9710543 | 14.5001489 |
| H  | 4.7799607  | 22.6755025 | 14.7026499 |
| C  | 7.8371721  | 22.3999968 | 12.2861712 |
| H  | 6.3642150  | 21.6810130 | 10.8555122 |
| C  | 7.9919825  | 22.8640806 | 13.5979777 |
| H  | 8.9939204  | 23.1618659 | 13.9340774 |
| C  | -3.7085228 | 20.1405569 | 9.5707359  |
| C  | -3.9309092 | 19.7731777 | 8.2408340  |
| C  | -4.7917518 | 20.2755568 | 10.4435168 |
| C  | -5.2267955 | 19.5562899 | 7.7601815  |
| H  | -3.0605205 | 19.6693398 | 7.5838487  |
| C  | -6.1027656 | 20.0672684 | 10.0022963 |
| H  | -4.5844281 | 20.5601522 | 11.4807344 |
| C  | -6.2875790 | 19.7176137 | 8.6594383  |
| H  | -7.3117114 | 19.5646216 | 8.2949650  |
| C  | 9.0535587  | 22.3330399 | 11.3534837 |
| C  | 10.1615690 | 21.4882020 | 12.0030962 |
| C  | 8.7091350  | 21.7080111 | 9.9993052  |
| C  | 9.5701495  | 23.7620510 | 11.1125737 |
| H  | 10.4963380 | 21.9109096 | 12.9667451 |
| H  | 9.8135058  | 20.4566643 | 12.1922189 |
| H  | 11.0446071 | 21.4357769 | 11.3391721 |
| H  | 7.9507260  | 22.2957227 | 9.4522743  |
| H  | 9.6134213  | 21.6668698 | 9.3657450  |
| H  | 8.3304771  | 20.6760361 | 10.1079746 |
| H  | 10.4529643 | 23.7507170 | 10.4455405 |
| H  | 8.7910219  | 24.3881501 | 10.6407298 |
| H  | 9.8691137  | 24.2530139 | 12.0561259 |
| C  | 7.1777039  | 23.5081219 | 15.9155119 |

|   |            |            |            |
|---|------------|------------|------------|
| C | 5.9181680  | 23.4559699 | 16.7840756 |
| C | 8.2690554  | 22.6712048 | 16.6029048 |
| C | 7.6390352  | 24.9722897 | 15.8140794 |
| H | 5.1046770  | 24.0799576 | 16.3726864 |
| H | 5.5376163  | 22.4246217 | 16.8921074 |
| H | 6.1447971  | 23.8365197 | 17.7964892 |
| H | 9.2266474  | 22.7052880 | 16.0537944 |
| H | 8.4593505  | 23.0497338 | 17.6248854 |
| H | 7.9652082  | 21.6117221 | 16.6811349 |
| H | 7.8318552  | 25.3903733 | 16.8202687 |
| H | 8.5685995  | 25.0680130 | 15.2252391 |
| H | 6.8675808  | 25.5950097 | 15.3257568 |
| C | -5.5156328 | 19.1902379 | 6.2983842  |
| C | -4.2334782 | 18.9240257 | 5.5061047  |
| C | -6.3867219 | 17.9247922 | 6.2378012  |
| C | -6.2635298 | 20.3612584 | 5.6381776  |
| H | -3.5826293 | 19.8149915 | 5.4582217  |
| H | -3.6473970 | 18.0947026 | 5.9410889  |
| H | -4.4852983 | 18.6450735 | 4.4668361  |
| H | -7.3591726 | 18.0618153 | 6.7431938  |
| H | -6.5962377 | 17.6529247 | 5.1864035  |
| H | -5.8781422 | 17.0691733 | 6.7172841  |
| H | -6.4968560 | 20.1290612 | 4.5817239  |
| H | -7.2165295 | 20.5802141 | 6.1531016  |
| H | -5.6518858 | 21.2814723 | 5.6609381  |
| C | -7.3207730 | 20.2336157 | 10.9202946 |
| C | -8.1582888 | 18.9444458 | 10.9066493 |
| C | -6.9169676 | 20.5258627 | 12.3674351 |
| C | -8.1730686 | 21.4065158 | 10.4066384 |
| H | -8.5289815 | 18.7008771 | 9.8953621  |
| H | -7.5647426 | 18.0826807 | 11.2617988 |
| H | -9.0397733 | 19.0487057 | 11.5668066 |
| H | -6.3504264 | 21.4699126 | 12.4576965 |
| H | -7.8205978 | 20.6226596 | 12.9957842 |
| H | -6.3004244 | 19.7140768 | 12.7932024 |
| H | -9.0635340 | 21.5499592 | 11.0474216 |
| H | -7.5925480 | 22.3471111 | 10.4102939 |
| H | -8.5263250 | 21.2351464 | 9.3739013  |
| H | 2.8431738  | 26.0169807 | 10.7301347 |
| C | 0.3402323  | 25.8574206 | 9.7645800  |
| C | 0.2176957  | 27.0048083 | 9.4308620  |
| C | 0.0326825  | 28.3483014 | 9.0199082  |
| C | 1.0610111  | 29.2972288 | 9.1641544  |
| C | -1.1915109 | 28.7597960 | 8.4578888  |
| H | -1.9912995 | 28.0298294 | 8.3421591  |
| C | 0.8681996  | 30.6131246 | 8.7579177  |
| C | -1.3740493 | 30.0766204 | 8.0561554  |
| H | -2.3243187 | 30.3901045 | 7.6249448  |
| C | -0.3467256 | 31.0165164 | 8.1997889  |
| H | 2.0078977  | 28.9844349 | 9.6021862  |
| H | 1.6531280  | 31.3575095 | 8.8697824  |
| N | -0.5200666 | 32.3863353 | 7.7896281  |
| C | -1.4517322 | 33.1675149 | 8.6071511  |
| H | -1.3308095 | 34.2389883 | 8.3801166  |
| H | -2.5204129 | 32.9017479 | 8.4425647  |
| H | -1.2332630 | 33.0108311 | 9.6728766  |
| C | -0.6510813 | 32.5967239 | 6.3455605  |
| H | -0.5351614 | 33.6689334 | 6.1211713  |
| H | 0.1393211  | 32.0455135 | 5.8173065  |
| H | -1.6293053 | 32.2663642 | 5.9274743  |

**Table S13. LD13-TiO2 (solv)**

193

|    |            |           |            |
|----|------------|-----------|------------|
| Ti | 7.8633895  | 5.3962343 | 14.2455952 |
| Ti | 4.3243172  | 5.1736184 | 12.9235313 |
| Ti | 0.7852422  | 4.9511021 | 11.6014578 |
| Ti | -2.7538300 | 4.7284862 | 10.2793939 |
| O  | 7.1643089  | 5.5481449 | 16.0914262 |
| O  | 3.6252339  | 5.3256285 | 14.7693527 |
| O  | 0.0861616  | 5.1030126 | 13.4472889 |
| O  | -3.4529107 | 4.8803967 | 12.1252250 |
| O  | 6.2348045  | 5.2542881 | 13.2125448 |
| O  | 2.6956360  | 5.0317658 | 11.8904364 |
| O  | -0.8434362 | 4.8091499 | 10.5683725 |
| O  | -4.3825112 | 4.5866335 | 9.2462990  |
| Ti | 3.4678864  | 9.5992735 | 19.8878385 |
| Ti | -0.0712793 | 9.3766517 | 18.5657397 |
| Ti | -3.6103543 | 9.1541353 | 17.2436662 |
| Ti | -7.1494266 | 8.9315194 | 15.9216024 |
| Ti | 4.3608377  | 7.5333287 | 17.8451771 |
| Ti | 0.8216692  | 7.3108063 | 16.5230686 |
| Ti | -2.7174031 | 7.0881904 | 15.2010047 |
| Ti | -6.2564781 | 6.8656740 | 13.8789312 |
| Ti | 3.4312371  | 7.2395654 | 14.9662511 |
| Ti | 6.9703121  | 7.4620818 | 16.2883246 |
| Ti | -0.1078351 | 7.0169495 | 13.6441872 |
| Ti | -3.6469101 | 6.7944332 | 12.3221137 |
| O  | 4.1669317  | 9.4473711 | 18.0421007 |
| O  | 0.6277660  | 9.2247492 | 16.7200019 |
| O  | -2.9113063 | 9.0021333 | 15.3979380 |
| O  | -6.4503813 | 8.7796169 | 14.0758645 |
| O  | 5.0964388  | 9.7411283 | 20.9209917 |
| O  | 1.5573638  | 9.5186119 | 19.5989182 |
| O  | -1.9817085 | 9.2959961 | 18.2768544 |
| O  | -5.5207834 | 9.0734797 | 16.9547808 |
| O  | -9.0598557 | 8.8508638 | 15.6327170 |
| O  | 5.0599183  | 7.3814181 | 15.9993460 |
| O  | 1.5207498  | 7.1588958 | 14.6772375 |
| O  | -2.0183224 | 6.9362799 | 13.3551737 |
| O  | -5.5573974 | 6.7137635 | 12.0331002 |
| O  | 3.6617897  | 7.6853306 | 19.6909053 |
| O  | 0.1226239  | 7.4627088 | 18.3688065 |
| O  | -3.4164484 | 7.2400929 | 17.0467426 |
| O  | -6.9555233 | 7.0175765 | 15.7246691 |
| O  | 2.7321918  | 7.3914679 | 16.8119889 |
| O  | 6.2712668  | 7.6139843 | 18.1340624 |
| O  | -0.8068804 | 7.1688520 | 15.4899251 |
| O  | -4.3459554 | 6.9463356 | 14.1678515 |
| O  | 7.6693574  | 7.3101794 | 14.4425867 |
| O  | 4.1302824  | 7.0876630 | 13.1205132 |
| O  | 0.5912102  | 6.8650471 | 11.7984493 |
| O  | -2.9478621 | 6.6424312 | 10.4763855 |
| H  | 6.0448758  | 9.7811735 | 21.0644459 |
| H  | -9.8683787 | 8.7804536 | 15.1198318 |
| O  | 9.7737833  | 5.4768980 | 14.5345738 |
| H  | 10.5821775 | 5.5473103 | 15.0475172 |
| H  | -5.3308901 | 4.5466024 | 9.1029730  |
| O  | 0.5977483  | 9.0117360 | 13.4633021 |
| O  | 2.7836052  | 9.1755487 | 14.2690726 |
| C  | 1.6727531  | 9.6622795 | 13.8011634 |

|    |            |            |            |
|----|------------|------------|------------|
| C  | 1.6264411  | 11.1348315 | 13.5882712 |
| C  | 0.4770231  | 11.7277971 | 13.0485356 |
| C  | 2.7300583  | 11.9400534 | 13.8978728 |
| C  | 0.4362350  | 13.0924991 | 12.8029454 |
| H  | -0.3793080 | 11.0992800 | 12.8178498 |
| C  | 2.6974152  | 13.3080645 | 13.6552231 |
| H  | 3.6160952  | 11.4762490 | 14.3247109 |
| C  | 1.5516057  | 13.9087366 | 13.0920947 |
| H  | -0.4583799 | 13.5402047 | 12.3737026 |
| H  | 3.5639933  | 13.9230045 | 13.8909153 |
| C  | 1.5069865  | 15.2947769 | 12.7971159 |
| C  | 1.4224366  | 16.4723076 | 12.4974575 |
| C  | 1.2698878  | 17.8285533 | 12.1163492 |
| C  | 2.3596761  | 18.7100122 | 12.3369979 |
| C  | 0.0279324  | 18.1965691 | 11.5335649 |
| C  | -2.0713056 | 18.0184938 | 10.7389735 |
| C  | 3.6251984  | 20.5126631 | 12.4010675 |
| C  | 4.3934773  | 19.4368106 | 12.9723077 |
| C  | 3.6090221  | 18.3208802 | 12.9309395 |
| N  | 2.3852802  | 20.0419848 | 12.0213982 |
| C  | -1.5893583 | 19.3680063 | 10.6038045 |
| N  | -0.3045669 | 19.4503945 | 11.0973585 |
| C  | -2.3245432 | 20.4270093 | 10.0484725 |
| C  | 4.0833116  | 21.8311648 | 12.2606468 |
| C  | -1.8666696 | 21.7467358 | 9.9027872  |
| C  | 3.3504024  | 22.8954399 | 11.7043041 |
| H  | -3.0594516 | 17.6721462 | 10.4264711 |
| H  | 3.8453798  | 17.3100951 | 13.2717301 |
| H  | 5.4120254  | 19.5312043 | 13.3568097 |
| C  | -1.0683882 | 17.2932697 | 11.3144668 |
| H  | -1.0614507 | 16.2318865 | 11.5714819 |
| N  | -0.6284050 | 22.2059916 | 10.2824096 |
| N  | 2.0681428  | 22.8024419 | 11.2132141 |
| C  | 1.7170116  | 24.0442287 | 10.7656981 |
| C  | 0.4973306  | 24.3864108 | 10.1924237 |
| C  | 2.8207555  | 24.9763303 | 10.9780139 |
| C  | 3.8300965  | 24.2378605 | 11.5648409 |
| Zn | 0.8780018  | 21.1225124 | 11.1528704 |
| C  | -2.6291890 | 22.8292461 | 9.3303683  |
| C  | -0.5880984 | 23.5410340 | 9.9677064  |
| C  | -1.8351022 | 23.9391934 | 9.3715544  |
| H  | -3.6482569 | 22.7403833 | 8.9457249  |
| H  | -2.0686628 | 24.9511408 | 9.0268829  |
| H  | 4.8145369  | 24.5970993 | 11.8704333 |
| C  | 5.4590528  | 22.1504882 | 12.7404421 |
| C  | 5.6551158  | 22.6043163 | 14.0476596 |
| C  | 6.5494225  | 22.0422948 | 11.8727669 |
| C  | 6.9269239  | 22.9710543 | 14.5001489 |
| H  | 4.7799607  | 22.6755025 | 14.7026499 |
| C  | 7.8371721  | 22.3999968 | 12.2861712 |
| H  | 6.3642150  | 21.6810130 | 10.8555122 |
| C  | 7.9919825  | 22.8640806 | 13.5979777 |
| H  | 8.9939204  | 23.1618659 | 13.9340774 |
| C  | -3.7085228 | 20.1405569 | 9.5707359  |
| C  | -3.9309092 | 19.7731777 | 8.2408340  |
| C  | -4.7917518 | 20.2755568 | 10.4435168 |
| C  | -5.2267955 | 19.5562899 | 7.7601815  |
| H  | -3.0605205 | 19.6693398 | 7.5838487  |
| C  | -6.1027656 | 20.0672684 | 10.0022963 |
| H  | -4.5844281 | 20.5601522 | 11.4807344 |
| C  | -6.2875790 | 19.7176137 | 8.6594383  |



|   |            |            |            |
|---|------------|------------|------------|
| H | -7.3117114 | 19.5646216 | 8.2949650  |
| C | 9.0535587  | 22.3330399 | 11.3534837 |
| C | 10.1615690 | 21.4882020 | 12.0030962 |
| C | 8.7091350  | 21.7080111 | 9.9993052  |
| C | 9.5701495  | 23.7620510 | 11.1125737 |
| H | 10.4963380 | 21.9109096 | 12.9667451 |
| H | 9.8135058  | 20.4566643 | 12.1922189 |
| H | 11.0446071 | 21.4357769 | 11.3391721 |
| H | 7.9507260  | 22.2957227 | 9.4522743  |
| H | 9.6134213  | 21.6668698 | 9.3657450  |
| H | 8.3304771  | 20.6760361 | 10.1079746 |
| H | 10.4529643 | 23.7507170 | 10.4455405 |
| H | 8.7910219  | 24.3881501 | 10.6407298 |
| H | 9.8691137  | 24.2530139 | 12.0561259 |
| C | 7.1777039  | 23.5081219 | 15.9155119 |
| C | 5.9181680  | 23.4559699 | 16.7840756 |
| C | 8.2690554  | 22.6712048 | 16.6029048 |
| C | 7.6390352  | 24.9722897 | 15.8140794 |
| H | 5.1046770  | 24.0799576 | 16.3726864 |
| H | 5.5376163  | 22.4246217 | 16.8921074 |
| H | 6.1447971  | 23.8365197 | 17.7964892 |
| H | 9.2266474  | 22.7052880 | 16.0537944 |
| H | 8.4593505  | 23.0497338 | 17.6248854 |
| H | 7.9652082  | 21.6117221 | 16.6811349 |
| H | 7.8318552  | 25.3903733 | 16.8202687 |
| H | 8.5685995  | 25.0680130 | 15.2252391 |
| H | 6.8675808  | 25.5950097 | 15.3257568 |
| C | -5.5156328 | 19.1902379 | 6.2983842  |
| C | -4.2334782 | 18.9240257 | 5.5061047  |
| C | -6.3867219 | 17.9247922 | 6.2378012  |
| C | -6.2635298 | 20.3612584 | 5.6381776  |
| H | -3.5826293 | 19.8149915 | 5.4582217  |
| H | -3.6473970 | 18.0947026 | 5.9410889  |
| H | -4.4852983 | 18.6450735 | 4.4668361  |
| H | -7.3591726 | 18.0618153 | 6.7431938  |
| H | -6.5962377 | 17.6529247 | 5.1864035  |
| H | -5.8781422 | 17.0691733 | 6.7172841  |
| H | -6.4968560 | 20.1290612 | 4.5817239  |
| H | -7.2165295 | 20.5802141 | 6.1531016  |
| H | -5.6518858 | 21.2814723 | 5.6609381  |
| C | -7.3207730 | 20.2336157 | 10.9202946 |
| C | -8.1582888 | 18.9444458 | 10.9066493 |
| C | -6.9169676 | 20.5258627 | 12.3674351 |
| C | -8.1730686 | 21.4065158 | 10.4066384 |
| H | -8.5289815 | 18.7008771 | 9.8953621  |
| H | -7.5647426 | 18.0826807 | 11.2617988 |
| H | -9.0397733 | 19.0487057 | 11.5668066 |
| H | -6.3504264 | 21.4699126 | 12.4576965 |
| H | -7.8205978 | 20.6226596 | 12.9957842 |
| H | -6.3004244 | 19.7140768 | 12.7932024 |
| H | -9.0635340 | 21.5499592 | 11.0474216 |
| H | -7.5925480 | 22.3471111 | 10.4102939 |
| H | -8.5263250 | 21.2351464 | 9.3739013  |
| H | 2.8431738  | 26.0169807 | 10.7301347 |
| C | 0.3402323  | 25.8574206 | 9.7645800  |
| C | 0.2176957  | 27.0048083 | 9.4308620  |
| C | 0.0392693  | 28.3530966 | 9.0232162  |
| C | 1.0699664  | 29.3002032 | 9.1722999  |
| C | -1.1829450 | 28.7672791 | 8.4572021  |
| H | -1.9892452 | 28.0455009 | 8.3362943  |
| C | 0.8800143  | 30.6176382 | 8.7669870  |

|   |            |            |           |
|---|------------|------------|-----------|
| C | -1.3618129 | 30.0851793 | 8.0558861 |
| H | -2.3125140 | 30.3901588 | 7.6207125 |
| C | -0.3328348 | 31.0242132 | 8.2060082 |
| H | 2.0203313  | 28.9947029 | 9.6068957 |
| H | 1.6733249  | 31.3536382 | 8.8789430 |
| N | -0.4973915 | 32.3963579 | 7.7964076 |
| C | -1.4593381 | 33.1619893 | 8.6016615 |
| H | -1.3730847 | 34.2300205 | 8.3504007 |
| H | -2.5152437 | 32.8558167 | 8.4338822 |
| H | -1.2299394 | 33.0365194 | 9.6688064 |
| C | -0.6541915 | 32.5874276 | 6.3477505 |
| H | -0.5700557 | 33.6594502 | 6.1133461 |
| H | 0.1449607  | 32.0521790 | 5.8167404 |
| H | -1.6321361 | 32.2286815 | 5.9586558 |

**Table S14. YD2-o-C8 (gas)**

230

|    |            |            |            |
|----|------------|------------|------------|
| Zn | 2.7818904  | -0.7306277 | 0.0403006  |
| C  | 5.1790883  | -2.6546089 | -0.0909450 |
| C  | 5.5167203  | -4.0538350 | 0.0096901  |
| C  | 4.3690380  | -4.7284834 | 0.3004019  |
| C  | 3.3089898  | -3.7524526 | 0.3968623  |
| N  | 3.8325426  | -2.4873457 | 0.1468339  |
| H  | 6.5097188  | -4.4608574 | -0.1329187 |
| H  | 4.2434828  | -5.7946201 | 0.4408877  |
| C  | 4.6154102  | 1.6401981  | -0.6429899 |
| C  | 6.0057240  | 1.9571323  | -0.8721485 |
| C  | 6.7069036  | 0.7922533  | -0.8093172 |
| C  | 5.7611318  | -0.2625687 | -0.5291069 |
| N  | 4.4945850  | 0.2723024  | -0.4244938 |
| H  | 6.3888799  | 2.9513296  | -1.0615503 |
| H  | 7.7726704  | 0.6480108  | -0.9340958 |
| C  | 0.3536702  | 1.1680535  | 0.0811788  |
| C  | -0.0076353 | 2.5453590  | -0.1441111 |
| C  | 1.1368189  | 3.2120734  | -0.4670415 |
| C  | 2.2222778  | 2.2587664  | -0.4323488 |
| N  | 1.7173239  | 1.0121018  | -0.1112836 |
| H  | -1.0128336 | 2.9406658  | -0.0733779 |
| H  | 1.2412971  | 4.2617315  | -0.7107510 |
| C  | 0.9471981  | -3.0876210 | 0.7755692  |
| C  | -0.4280426 | -3.3847633 | 1.1008881  |
| C  | -1.1271963 | -2.2163282 | 1.0377014  |
| C  | -0.1930455 | -1.1812066 | 0.6811994  |
| N  | 1.0721311  | -1.7275318 | 0.5455123  |
| H  | -0.8165403 | -4.3656864 | 1.3350748  |
| H  | -2.1830963 | -2.0704829 | 1.2183513  |
| C  | -0.5292649 | 0.1547702  | 0.4504913  |
| C  | 1.9748290  | -4.0365771 | 0.6778607  |
| C  | 3.5718966  | 2.5635380  | -0.6559430 |
| C  | 6.0932839  | -1.6247268 | -0.3945979 |
| C  | 1.5579080  | -5.4608459 | 0.8389191  |
| C  | 1.8599151  | -6.1880752 | 1.9900973  |
| C  | 1.3199425  | -7.4642487 | 2.1621499  |
| C  | 0.5024123  | -8.0385220 | 1.1831441  |
| C  | 0.2156656  | -7.2977657 | 0.0340650  |
| C  | 0.7459550  | -6.0248068 | -0.1451230 |
| H  | 2.4699057  | -5.7632613 | 2.7813889  |
| H  | 0.1157002  | -9.0456861 | 1.2993807  |

|   |             |            |            |
|---|-------------|------------|------------|
| H | 0.4791440   | -5.4619910 | -1.0328031 |
| C | 3.9060205   | 3.9956727  | -0.8960703 |
| C | 3.7946532   | 4.9256824  | 0.1437283  |
| C | 4.0366374   | 6.2846833  | -0.0673210 |
| C | 4.4154847   | 6.7129379  | -1.3357078 |
| C | 4.5532162   | 5.8093705  | -2.3889306 |
| C | 4.2950644   | 4.4548897  | -2.1632196 |
| H | 4.6136962   | 7.7695257  | -1.5100467 |
| C | 7.4452485   | -1.9906613 | -0.5925512 |
| C | 8.6050820   | -2.3088090 | -0.7746770 |
| C | 9.9488635   | -2.6804569 | -1.0013487 |
| C | 10.9169359  | -1.7125973 | -1.3449000 |
| C | 12.2304764  | -2.0829962 | -1.5785754 |
| C | 12.6197547  | -3.4258990 | -1.4772489 |
| C | 11.6676421  | -4.3950094 | -1.1319067 |
| C | 10.3516291  | -4.0285252 | -0.8966736 |
| H | 10.6197971  | -0.6692977 | -1.4267996 |
| H | 12.9793861  | -1.3404655 | -1.8451202 |
| H | 11.9697205  | -5.4353912 | -1.0513765 |
| H | 9.6147306   | -4.7829906 | -0.6291489 |
| C | 14.0217005  | -3.7660416 | -1.7421614 |
| O | 14.2883056  | -5.1181176 | -1.6080204 |
| O | 14.9101735  | -2.9685436 | -2.0566306 |
| N | -1.9188633  | 0.5061756  | 0.5666712  |
| C | -2.6634574  | 0.6918394  | -0.6326305 |
| C | -2.3927882  | -0.0966729 | -1.7582860 |
| C | -3.1078538  | 0.0895001  | -2.9356726 |
| C | -4.1193553  | 1.0525924  | -3.0330852 |
| C | -4.3733254  | 1.8404112  | -1.9047514 |
| C | -3.6539382  | 1.6765374  | -0.7246293 |
| H | -1.6195406  | -0.8573483 | -1.7094381 |
| H | -2.8768326  | -0.5409370 | -3.7949856 |
| H | -5.1430162  | 2.6112503  | -1.9524172 |
| H | -3.8647794  | 2.3094970  | 0.1347660  |
| C | -2.5259269  | 0.5143534  | 1.8469792  |
| C | -1.7629905  | 0.8196123  | 2.9821786  |
| C | -2.3321315  | 0.7659004  | 4.2508616  |
| C | -3.6742009  | 0.4202385  | 4.4369535  |
| C | -4.4299616  | 0.1293779  | 3.2949939  |
| C | -3.8727333  | 0.1620674  | 2.0223488  |
| H | -0.7153642  | 1.0864203  | 2.8656396  |
| H | -1.7145199  | 1.0025591  | 5.1177104  |
| H | -5.4768330  | -0.1558503 | 3.4058154  |
| H | -4.4790339  | -0.1051546 | 1.1609610  |
| C | -4.9247972  | 1.1967925  | -4.3013934 |
| H | -4.2434854  | 1.3333679  | -5.1574201 |
| H | -5.5350065  | 2.1113648  | -4.2471636 |
| C | -5.8311483  | -0.0184792 | -4.5981199 |
| H | -6.3453944  | 0.1547833  | -5.5585418 |
| H | -5.1939676  | -0.9056545 | -4.7519576 |
| C | -6.8575372  | -0.3416152 | -3.5023599 |
| H | -7.4202398  | -1.2397441 | -3.8077008 |
| H | -6.3212627  | -0.6207716 | -2.5803668 |
| C | -7.8414750  | 0.7920702  | -3.1648815 |
| H | -7.2945089  | 1.6194657  | -2.6833271 |
| H | -8.5493656  | 0.4198348  | -2.4034299 |
| C | -8.6412486  | 1.3523594  | -4.3516117 |
| H | -9.2926479  | 2.1617378  | -3.9801659 |
| H | -7.9551516  | 1.8297771  | -5.0726896 |
| C | -9.4978708  | 0.3103363  | -5.0772120 |
| H | -10.1797045 | -0.2001131 | -4.3759301 |

|   |             |            |            |
|---|-------------|------------|------------|
| H | -10.1123022 | 0.7771797  | -5.8631570 |
| H | -8.8793088  | -0.4633781 | -5.5591460 |
| C | -4.3065633  | 0.4123518  | 5.8046150  |
| H | -5.0047381  | -0.4378717 | 5.8881162  |
| H | -3.5320905  | 0.2557181  | 6.5725846  |
| C | -5.0679860  | 1.7140246  | 6.1150522  |
| H | -5.8238297  | 1.8744169  | 5.3288806  |
| H | -4.3675829  | 2.5621334  | 6.0400636  |
| C | -5.7310159  | 1.7087979  | 7.4950542  |
| H | -6.4710148  | 0.8901031  | 7.5390679  |
| H | -4.9704482  | 1.4641228  | 8.2566975  |
| C | -6.3958669  | 3.0397610  | 7.8807561  |
| H | -6.8249681  | 2.9386786  | 8.8931840  |
| H | -5.6169734  | 3.8188856  | 7.9537729  |
| C | -7.4947785  | 3.5341307  | 6.9254379  |
| H | -7.0555034  | 3.7655866  | 5.9410318  |
| H | -7.8798630  | 4.4931678  | 7.3104919  |
| C | -8.6596126  | 2.5559131  | 6.7491854  |
| H | -8.3383371  | 1.6216291  | 6.2611015  |
| H | -9.1029271  | 2.2859208  | 7.7227173  |
| H | -9.4567677  | 2.9939485  | 6.1277477  |
| H | 15.2434449  | -5.2827221 | -1.7973027 |
| H | 3.9476484   | 6.9899725  | 0.7543955  |
| H | 4.8496890   | 6.1650392  | -3.3707148 |
| O | 3.4419042   | 4.4074732  | 1.3797130  |
| O | 4.3778989   | 3.4778932  | -3.1375666 |
| O | 1.6374572   | -8.0864349 | 3.3613914  |
| O | -0.6114466  | -7.7412037 | -0.9880569 |
| C | 2.5125372   | 5.1448068  | 2.2360163  |
| H | 1.7689307   | 5.6593042  | 1.6043121  |
| H | 3.0633456   | 5.9028196  | 2.8166062  |
| C | 1.8555124   | 4.1198143  | 3.1390546  |
| H | 1.3916972   | 3.3505167  | 2.5015466  |
| H | 2.6382263   | 3.6124416  | 3.7250471  |
| C | 0.8055335   | 4.7340659  | 4.0676771  |
| H | 0.0315639   | 5.2314010  | 3.4582232  |
| H | 1.2651952   | 5.5244514  | 4.6891221  |
| C | 0.1575455   | 3.6885701  | 4.9820388  |
| H | -0.2745573  | 2.8876371  | 4.3585982  |
| H | 0.9484022   | 3.2146936  | 5.5883439  |
| C | -0.9293784  | 4.2418763  | 5.9122606  |
| H | -1.1872229  | 3.4707665  | 6.6591443  |
| H | -0.5215168  | 5.0954507  | 6.4845343  |
| C | -2.2154339  | 4.6729776  | 5.1981626  |
| H | -1.9896338  | 5.4331726  | 4.4308754  |
| H | -2.6327587  | 3.8049135  | 4.6564844  |
| C | -3.2731042  | 5.2357195  | 6.1517794  |
| H | -2.8630975  | 6.1207501  | 6.6696590  |
| H | -3.4795920  | 4.4929631  | 6.9422544  |
| C | -4.5772618  | 5.6087587  | 5.4446902  |
| H | -5.3329030  | 5.9804907  | 6.1541851  |
| H | -4.4068473  | 6.3930495  | 4.6888272  |
| H | -5.0073346  | 4.7360143  | 4.9270147  |
| C | 4.7901362   | 3.8099596  | -4.4934507 |
| H | 5.7961493   | 4.2633179  | -4.4748873 |
| H | 4.0859566   | 4.5404000  | -4.9279828 |
| C | 4.7837031   | 2.5076561  | -5.2690101 |
| H | 5.4662286   | 1.8009435  | -4.7712053 |
| H | 3.7764709   | 2.0675684  | -5.1996127 |
| C | 5.1811691   | 2.6889848  | -6.7361971 |
| H | 6.1942632   | 3.1260117  | -6.7974624 |

|   |            |             |             |
|---|------------|-------------|-------------|
| H | 4.5036615  | 3.4174440   | -7.2177429  |
| C | 5.1486808  | 1.3759621   | -7.5243390  |
| H | 5.8248014  | 0.6462725   | -7.0442504  |
| H | 4.1359923  | 0.9395924   | -7.4597318  |
| C | 5.5373480  | 1.5385341   | -8.9957867  |
| H | 6.5549571  | 1.9645172   | -9.0609229  |
| H | 4.8670538  | 2.2775915   | -9.4713097  |
| C | 5.4852591  | 0.2272661   | -9.7848693  |
| H | 6.1536630  | -0.5127320  | -9.3080588  |
| H | 4.4668728  | -0.1974264  | -9.7194015  |
| C | 5.8730866  | 0.3832735   | -11.2585942 |
| H | 6.8922244  | 0.8041349   | -11.3223017 |
| H | 5.2072481  | 1.1268882   | -11.7316613 |
| C | 5.8097897  | -0.9329240  | -12.0373479 |
| H | 6.0962125  | -0.7946007  | -13.0918551 |
| H | 6.4884656  | -1.6847527  | -11.6008227 |
| H | 4.7915602  | -1.3561711  | -12.0181905 |
| C | 0.7429406  | -9.0705572  | 3.9787324   |
| H | -0.2110061 | -9.1151078  | 3.4302087   |
| H | 1.2396099  | -10.0491761 | 3.9042339   |
| C | 0.4917990  | -8.6884326  | 5.4311459   |
| H | 0.0487984  | -9.5738276  | 5.9195714   |
| H | 1.4620041  | -8.5098446  | 5.9223062   |
| C | -0.4422833 | -7.4814463  | 5.6302508   |
| H | -1.3202212 | -7.6089812  | 4.9727649   |
| H | -0.8336853 | -7.4997407  | 6.6622187   |
| C | 0.2079226  | -6.1137903  | 5.3791957   |
| H | 1.0247937  | -5.9764017  | 6.1086782   |
| H | 0.6831224  | -6.1049988  | 4.3901130   |
| C | -0.7578670 | -4.9237250  | 5.4612491   |
| H | -0.1689727 | -3.9941729  | 5.3759815   |
| H | -1.2405307 | -4.8912108  | 6.4553460   |
| C | -1.8354523 | -4.9199680  | 4.3685278   |
| H | -2.5657014 | -5.7269734  | 4.5534642   |
| H | -1.3619523 | -5.1547590  | 3.3981409   |
| C | -2.5842925 | -3.5890839  | 4.2471267   |
| H | -3.0002341 | -3.3077429  | 5.2309035   |
| H | -1.8697652 | -2.7931719  | 3.9785169   |
| C | -3.7072871 | -3.6345096  | 3.2095420   |
| H | -4.4757526 | -4.3768125  | 3.4841698   |
| H | -4.1963384 | -2.6544802  | 3.1065234   |
| H | -3.3147346 | -3.9196496  | 2.2198299   |
| C | -1.7307820 | -8.6530360  | -0.7286667  |
| H | -1.4160935 | -9.6610879  | -1.0371237  |
| H | -1.9608735 | -8.6696958  | 0.3499413   |
| C | -2.9295903 | -8.1685578  | -1.5379072  |
| H | -3.5746456 | -9.0398604  | -1.7446944  |
| H | -2.5562546 | -7.8211959  | -2.5108604  |
| C | -3.7902266 | -7.0961066  | -0.8417769  |
| H | -4.2415003 | -7.5711202  | 0.0480675   |
| H | -4.6354087 | -6.8396684  | -1.5047830  |
| C | -3.0988848 | -5.7949112  | -0.3877024  |
| H | -3.6968620 | -5.3709831  | 0.4357359   |
| H | -2.1155914 | -6.0253100  | 0.0494284   |
| C | -2.9350040 | -4.6882203  | -1.4405492  |
| H | -3.9345579 | -4.3312723  | -1.7495415  |
| H | -2.4531036 | -3.8328143  | -0.9397960  |
| C | -2.1320878 | -5.0496053  | -2.7002281  |
| H | -2.7627194 | -5.6561726  | -3.3714865  |
| H | -1.2775144 | -5.6906103  | -2.4308947  |
| C | -1.6256921 | -3.8081556  | -3.4580041  |

|   |            |            |            |
|---|------------|------------|------------|
| H | -1.3818151 | -4.0856949 | -4.4969740 |
| H | -2.4434562 | -3.0666368 | -3.5227559 |
| C | -0.3905638 | -3.1632055 | -2.8153708 |
| H | -0.5542828 | -2.9209564 | -1.7545307 |
| H | 0.4758955  | -3.8428803 | -2.8639369 |
| H | -0.1074276 | -2.2305387 | -3.3284801 |

**Table S15. YD2-o-C8 (solv)**

230

|    |            |            |            |
|----|------------|------------|------------|
| Zn | 2.8916315  | -0.7327510 | 0.2366719  |
| C  | 5.3236141  | -2.5874097 | -0.1503753 |
| C  | 5.7023696  | -3.9804293 | -0.1183369 |
| C  | 4.5929605  | -4.6939851 | 0.2315103  |
| C  | 3.5201274  | -3.7493472 | 0.4328249  |
| N  | 3.9928004  | -2.4633196 | 0.1843350  |
| H  | 6.6926602  | -4.3602671 | -0.3380469 |
| H  | 4.5071698  | -5.7668317 | 0.3558749  |
| C  | 4.5899656  | 1.6981473  | -0.5911117 |
| C  | 5.9566425  | 2.0655841  | -0.8816342 |
| C  | 6.7015703  | 0.9251600  | -0.8637759 |
| C  | 5.8077271  | -0.1652078 | -0.5513933 |
| N  | 4.5296776  | 0.3246419  | -0.3726887 |
| H  | 6.3001486  | 3.0713181  | -1.0857829 |
| H  | 7.7643762  | 0.8242782  | -1.0469755 |
| C  | 0.4028736  | 1.0762553  | 0.4162944  |
| C  | -0.0283914 | 2.4302431  | 0.1700376  |
| C  | 1.0578075  | 3.1245742  | -0.2736448 |
| C  | 2.1836743  | 2.2207084  | -0.2758502 |
| N  | 1.7540467  | 0.9654652  | 0.1222527  |
| H  | -1.0320522 | 2.8047257  | 0.3194357  |
| H  | 1.0947186  | 4.1668499  | -0.5615750 |
| C  | 1.1946453  | -3.1534672 | 1.0676309  |
| C  | -0.1578491 | -3.5113674 | 1.4210525  |
| C  | -0.8951533 | -2.3647422 | 1.4365147  |
| C  | -0.0088817 | -1.2847996 | 1.0885495  |
| N  | 1.2696168  | -1.7804966 | 0.8949330  |
| H  | -0.5058401 | -4.5191620 | 1.5984454  |
| H  | -1.9520929 | -2.2627499 | 1.6378282  |
| C  | -0.4105452 | 0.0384754  | 0.8776276  |
| C  | 2.2273655  | -4.0723897 | 0.8338870  |
| C  | 3.5071247  | 2.5790117  | -0.5727542 |
| C  | 6.1888604  | -1.5196434 | -0.4716875 |
| C  | 1.8309413  | -5.5114181 | 0.9220374  |
| C  | 1.6498071  | -6.1389654 | 2.1537584  |
| C  | 1.0656188  | -7.4069927 | 2.2004391  |
| C  | 0.6713164  | -8.0608631 | 1.0307746  |
| C  | 0.8492092  | -7.4136958 | -0.1942216 |
| C  | 1.4512946  | -6.1592660 | -0.2551790 |
| H  | 1.8929344  | -5.6356589 | 3.0849799  |
| H  | 0.2343845  | -9.0529209 | 1.0724656  |
| H  | 1.5412292  | -5.6627531 | -1.2166902 |
| C  | 3.7761445  | 4.0114561  | -0.8850906 |
| C  | 3.6509436  | 5.0020078  | 0.0966417  |
| C  | 3.8863826  | 6.3475288  | -0.1940064 |
| C  | 4.2651504  | 6.7071271  | -1.4837372 |
| C  | 4.4026437  | 5.7450724  | -2.4847218 |
| C  | 4.1517305  | 4.4050290  | -2.1823998 |
| H  | 4.4573219  | 7.7530366  | -1.7177063 |
| C  | 7.5386840  | -1.8390743 | -0.7499279 |

|   |             |            |            |
|---|-------------|------------|------------|
| C | 8.6953634   | -2.1273605 | -0.9933416 |
| C | 10.0335088  | -2.4810204 | -1.2797804 |
| C | 10.9829560  | -1.4973429 | -1.6305846 |
| C | 12.2911081  | -1.8558890 | -1.9138020 |
| C | 12.6903135  | -3.1992813 | -1.8557499 |
| C | 11.7529954  | -4.1830232 | -1.5069616 |
| C | 10.4426596  | -3.8303612 | -1.2225612 |
| H | 10.6821983  | -0.4530565 | -1.6789690 |
| H | 13.0205231  | -1.0962403 | -2.1850335 |
| H | 12.0544588  | -5.2253681 | -1.4593806 |
| H | 9.7203982   | -4.5980127 | -0.9529665 |
| C | 14.0858334  | -3.5311523 | -2.1653715 |
| O | 14.3607978  | -4.8727375 | -2.0751930 |
| O | 14.9614861  | -2.7114601 | -2.4816810 |
| N | -1.7915680  | 0.3437165  | 1.1098061  |
| C | -2.6242504  | 0.5936348  | -0.0223407 |
| C | -2.5431375  | -0.2296740 | -1.1505425 |
| C | -3.3486694  | 0.0184575  | -2.2581152 |
| C | -4.2660359  | 1.0771654  | -2.2698048 |
| C | -4.3286170  | 1.8981973  | -1.1364211 |
| C | -3.5140370  | 1.6717525  | -0.0321433 |
| H | -1.8493007  | -1.0665591 | -1.1581871 |
| H | -3.2711452  | -0.6378991 | -3.1260970 |
| H | -5.0213421  | 2.7398047  | -1.1184705 |
| H | -3.5713650  | 2.3269758  | 0.8340794  |
| C | -2.3121898  | 0.3027913  | 2.4264624  |
| C | -1.4558432  | 0.4328561  | 3.5293786  |
| C | -1.9602858  | 0.3821023  | 4.8247875  |
| C | -3.3270994  | 0.2143191  | 5.0726616  |
| C | -4.1714450  | 0.0824192  | 3.9650206  |
| C | -3.6807964  | 0.1093992  | 2.6648071  |
| H | -0.3906373  | 0.5796259  | 3.3716662  |
| H | -1.2715524  | 0.4940683  | 5.6626828  |
| H | -5.2404029  | -0.0660992 | 4.1200123  |
| H | -4.3658539  | -0.0262937 | 1.8335356  |
| C | -5.1855874  | 1.2881660  | -3.4482047 |
| H | -4.5909603  | 1.3670363  | -4.3732276 |
| H | -5.7103282  | 2.2485893  | -3.3345119 |
| C | -6.2142227  | 0.1507070  | -3.6363673 |
| H | -6.8350449  | 0.3873419  | -4.5164685 |
| H | -5.6748507  | -0.7782674 | -3.8878900 |
| C | -7.1083962  | -0.1212282 | -2.4173433 |
| H | -7.7822981  | -0.9588147 | -2.6624602 |
| H | -6.4784944  | -0.4731329 | -1.5830800 |
| C | -7.9366306  | 1.0773524  | -1.9241708 |
| H | -7.2601469  | 1.8411078  | -1.5064443 |
| H | -8.5651370  | 0.7390022  | -1.0811923 |
| C | -8.8375478  | 1.7397107  | -2.9781201 |
| H | -9.3649401  | 2.5831503  | -2.5011403 |
| H | -8.2159087  | 2.1866864  | -3.7731945 |
| C | -9.8651944  | 0.7939511  | -3.6072330 |
| H | -10.4870104 | 0.3136930  | -2.8322123 |
| H | -10.5383557 | 1.3362743  | -4.2902844 |
| H | -9.3805374  | -0.0075625 | -4.1877794 |
| C | -3.8825683  | 0.2447666  | 6.4726682  |
| H | -4.7685401  | -0.4087228 | 6.5354306  |
| H | -3.1406085  | -0.1579422 | 7.1811478  |
| C | -4.2812090  | 1.6645282  | 6.9162979  |
| H | -4.9788499  | 2.0785646  | 6.1700978  |
| H | -3.3875458  | 2.3118638  | 6.8911586  |
| C | -4.9104749  | 1.7091346  | 8.3104065  |

|   |            |            |            |
|---|------------|------------|------------|
| H | -5.8485510 | 1.1276480  | 8.3025395  |
| H | -4.2427119 | 1.1944097  | 9.0231340  |
| C | -5.1768721 | 3.1308696  | 8.8309678  |
| H | -5.6375430 | 3.0589686  | 9.8322996  |
| H | -4.2091133 | 3.6442183  | 8.9710723  |
| C | -6.0709741 | 4.0069877  | 7.9369504  |
| H | -5.5567345 | 4.2129520  | 6.9824508  |
| H | -6.1944949 | 4.9874605  | 8.4272844  |
| C | -7.4512369 | 3.4076936  | 7.6517680  |
| H | -7.3797720 | 2.4815042  | 7.0590814  |
| H | -7.9775910 | 3.1618379  | 8.5900314  |
| H | -8.0815362 | 4.1131690  | 7.0870781  |
| H | 15.3088199 | -5.0567751 | -2.2892501 |
| H | 3.7865419  | 7.0974573  | 0.5859795  |
| H | 4.6902163  | 6.0465549  | -3.4870461 |
| O | 3.2862854  | 4.5851662  | 1.3755077  |
| O | 4.2207415  | 3.3826340  | -3.1101395 |
| O | 0.8794294  | -7.9375053 | 3.4680139  |
| O | 0.4280529  | -7.9416501 | -1.4081314 |
| C | 2.2028728  | 5.3338291  | 2.0474437  |
| H | 1.5042001  | 5.6925600  | 1.2763319  |
| H | 2.6290827  | 6.2063266  | 2.5643279  |
| C | 1.5052869  | 4.3908062  | 3.0103588  |
| H | 1.3970953  | 3.4128657  | 2.5172307  |
| H | 2.1273169  | 4.2369516  | 3.9070637  |
| C | 0.1173615  | 4.9136885  | 3.3983906  |
| H | -0.4990137 | 4.9657538  | 2.4848039  |
| H | 0.1930002  | 5.9477991  | 3.7797715  |
| C | -0.5825126 | 4.0408450  | 4.4450711  |
| H | -0.5163385 | 2.9828347  | 4.1407159  |
| H | -0.0348615 | 4.1234543  | 5.3994014  |
| C | -2.0604181 | 4.4004651  | 4.6628767  |
| H | -2.4087066 | 3.9439078  | 5.6045471  |
| H | -2.1562864 | 5.4941253  | 4.7962649  |
| C | -2.9850957 | 3.9330945  | 3.5320628  |
| H | -2.6427270 | 4.3435444  | 2.5651934  |
| H | -2.9107847 | 2.8369533  | 3.4460026  |
| C | -4.4512544 | 4.3223879  | 3.7437757  |
| H | -4.5356759 | 5.4227824  | 3.7915742  |
| H | -4.7833223 | 3.9454619  | 4.7265594  |
| C | -5.3768615 | 3.7786323  | 2.6525625  |
| H | -6.4247778 | 4.0734697  | 2.8233756  |
| H | -5.0804843 | 4.1552199  | 1.6586784  |
| H | -5.3344178 | 2.6779782  | 2.6175863  |
| C | 4.7889495  | 3.6243936  | -4.4376662 |
| H | 5.7957111  | 4.0591737  | -4.3290934 |
| H | 4.1536106  | 4.3382448  | -4.9861743 |
| C | 4.8333987  | 2.2789939  | -5.1320082 |
| H | 5.4461409  | 1.5906718  | -4.5282714 |
| H | 3.8136552  | 1.8620692  | -5.1526722 |
| C | 5.3890467  | 2.3708859  | -6.5559052 |
| H | 6.4156799  | 2.7770358  | -6.5277331 |
| H | 4.7878977  | 3.0890120  | -7.1416493 |
| C | 5.3977711  | 1.0180562  | -7.2740154 |
| H | 5.9973176  | 0.2982677  | -6.6882038 |
| H | 4.3697075  | 0.6142876  | -7.2978883 |
| C | 5.9448455  | 1.0903960  | -8.7017820 |
| H | 6.9790458  | 1.4789334  | -8.6779614 |
| H | 5.3546202  | 1.8232658  | -9.2814251 |
| C | 5.9263678  | -0.2586075 | -9.4264659 |
| H | 6.5150750  | -0.9926439 | -8.8462392 |



|   |            |            |             |
|---|------------|------------|-------------|
| H | 4.8911312  | -0.6454826 | -9.4490696  |
| C | 6.4707253  | -0.1925286 | -10.8568399 |
| H | 7.5064607  | 0.1901891  | -10.8321420 |
| H | 5.8847379  | 0.5456864  | -11.4327755 |
| C | 6.4392071  | -1.5450237 | -11.5734364 |
| H | 6.8352065  | -1.4696195 | -12.5988022 |
| H | 7.0437447  | -2.2929753 | -11.0328535 |
| H | 5.4089930  | -1.9342178 | -11.6378132 |
| C | -0.2241187 | -8.8815558 | 3.7357970   |
| H | -0.9461011 | -8.8553966 | 2.9054330   |
| H | 0.2122181  | -9.8882853 | 3.7915458   |
| C | -0.8978763 | -8.4859501 | 5.0396476   |
| H | -1.4624070 | -9.3657364 | 5.3912438   |
| H | -0.1179978 | -8.2901964 | 5.7935905   |
| C | -1.8579049 | -7.2903269 | 4.9365529   |
| H | -2.6061592 | -7.5111142 | 4.1553870   |
| H | -2.4196699 | -7.2133176 | 5.8841491   |
| C | -1.1923433 | -5.9362803 | 4.6557543   |
| H | -0.4264856 | -5.7554496 | 5.4292054   |
| H | -0.6501373 | -5.9723647 | 3.6991514   |
| C | -2.1678595 | -4.7519332 | 4.6185457   |
| H | -1.5856144 | -3.8140874 | 4.6025545   |
| H | -2.7643109 | -4.7285140 | 5.5492657   |
| C | -3.1092571 | -4.7502879 | 3.4084179   |
| H | -3.7583422 | -5.6427438 | 3.4228418   |
| H | -2.5059638 | -4.8324168 | 2.4866194   |
| C | -3.9800777 | -3.4934688 | 3.3248949   |
| H | -4.6699558 | -3.4681115 | 4.1867357   |
| H | -3.3448190 | -2.5995219 | 3.4310874   |
| C | -4.7756091 | -3.3997442 | 2.0214353   |
| H | -5.4371297 | -4.2729679 | 1.8923709   |
| H | -5.4000606 | -2.4930207 | 1.9948308   |
| H | -4.1014301 | -3.3644247 | 1.1476545   |
| C | -0.8011466 | -8.7606904 | -1.5192670  |
| H | -0.4895303 | -9.6419862 | -2.0927210  |
| H | -1.1327938 | -9.0921714 | -0.5252322  |
| C | -1.9084353 | -8.0047605 | -2.2495193  |
| H | -2.5333211 | -8.7680582 | -2.7437552  |
| H | -1.4474527 | -7.4190267 | -3.0564462  |
| C | -2.8430138 | -7.1435900 | -1.3770930  |
| H | -3.2723465 | -7.8096226 | -0.6073022  |
| H | -3.6945943 | -6.8212147 | -2.0021776  |
| C | -2.2598434 | -5.9045793 | -0.6716135  |
| H | -2.9145700 | -5.6698785 | 0.1850143   |
| H | -1.2794552 | -6.1440552 | -0.2350517  |
| C | -2.1373356 | -4.6237545 | -1.5108637  |
| H | -3.1441030 | -4.3046081 | -1.8363550  |
| H | -1.7723129 | -3.8298582 | -0.8403610  |
| C | -1.2215864 | -4.7018848 | -2.7429142  |
| H | -1.7354001 | -5.2562934 | -3.5448751  |
| H | -0.3187690 | -5.2868651 | -2.4982035  |
| C | -0.7990401 | -3.3205069 | -3.2736300  |
| H | -0.4183121 | -3.4262277 | -4.3031455  |
| H | -1.6931171 | -2.6731007 | -3.3430050  |
| C | 0.2700607  | -2.6346691 | -2.4144855  |
| H | -0.0536192 | -2.5190637 | -1.3708714  |
| H | 1.2018428  | -3.2244769 | -2.3986098  |
| H | 0.5133312  | -1.6296593 | -2.7952411  |

**Table S16. YD2-o-C8-TiO2 (gas)**

283

|    |            |            |            |
|----|------------|------------|------------|
| Ti | 7.8633873  | 5.3962328  | 14.2455912 |
| Ti | 4.3243160  | 5.1736169  | 12.9235277 |
| Ti | 0.7852420  | 4.9511007  | 11.6014545 |
| Ti | -2.7538292 | 4.7284849  | 10.2793910 |
| O  | 7.1643069  | 5.5481433  | 16.0914217 |
| O  | 3.6252329  | 5.3256270  | 14.7693486 |
| O  | 0.0861616  | 5.1030112  | 13.4472851 |
| O  | -3.4529097 | 4.8803953  | 12.1252216 |
| O  | 6.2348027  | 5.2542866  | 13.2125411 |
| O  | 2.6956352  | 5.0317644  | 11.8904331 |
| O  | -0.8434360 | 4.8091485  | 10.5683695 |
| O  | -4.3825100 | 4.5866322  | 9.2462964  |
| Ti | 3.4678854  | 9.5992708  | 19.8878329 |
| Ti | -0.0712793 | 9.3766491  | 18.5657345 |
| Ti | -3.6103533 | 9.1541327  | 17.2436614 |
| Ti | -7.1494246 | 8.9315169  | 15.9215979 |
| Ti | 4.3608365  | 7.5333266  | 17.8451721 |
| Ti | 0.8216690  | 7.3108042  | 16.5230640 |
| Ti | -2.7174023 | 7.0881884  | 15.2010004 |
| Ti | -6.2564763 | 6.8656721  | 13.8789273 |
| Ti | 3.4312361  | 7.2395634  | 14.9662469 |
| Ti | 6.9703101  | 7.4620797  | 16.2883200 |
| Ti | -0.1078351 | 7.0169475  | 13.6441834 |
| Ti | -3.6469091 | 6.7944313  | 12.3221102 |
| O  | 4.1669305  | 9.4473684  | 18.0420956 |
| O  | 0.6277658  | 9.2247466  | 16.7199972 |
| O  | -2.9113055 | 9.0021308  | 15.3979337 |
| O  | -6.4503795 | 8.7796144  | 14.0758605 |
| O  | 5.0964374  | 9.7411256  | 20.9209858 |
| O  | 1.5573634  | 9.5186092  | 19.5989127 |
| O  | -1.9817079 | 9.2959935  | 18.2768493 |
| O  | -5.5207818 | 9.0734772  | 16.9547760 |
| O  | -9.0598532 | 8.8508613  | 15.6327126 |
| O  | 5.0599169  | 7.3814160  | 15.9993415 |
| O  | 1.5207494  | 7.1588938  | 14.6772334 |
| O  | -2.0183218 | 6.9362780  | 13.3551699 |
| O  | -5.5573958 | 6.7137616  | 12.0330968 |
| O  | 3.6617887  | 7.6853284  | 19.6908998 |
| O  | 0.1226239  | 7.4627067  | 18.3688013 |
| O  | -3.4164474 | 7.2400909  | 17.0467378 |
| O  | -6.9555213 | 7.0175745  | 15.7246647 |
| O  | 2.7321910  | 7.3914658  | 16.8119842 |
| O  | 6.2712650  | 7.6139822  | 18.1340573 |
| O  | -0.8068802 | 7.1688500  | 15.4899208 |
| O  | -4.3459542 | 6.9463336  | 14.1678475 |
| O  | 7.6693552  | 7.3101773  | 14.4425826 |
| O  | 4.1302812  | 7.0876610  | 13.1205095 |
| O  | 0.5912100  | 6.8650452  | 11.7984460 |
| O  | -2.9478613 | 6.6424293  | 10.4763826 |
| H  | 6.0448741  | 9.7811708  | 21.0644400 |
| H  | -9.8683759 | 8.7804511  | 15.1198276 |
| O  | 9.7737806  | 5.4768965  | 14.5345697 |
| H  | 10.5821745 | 5.5473087  | 15.0475130 |
| H  | -5.3308886 | 4.5466011  | 9.1029704  |
| O  | 0.5972212  | 9.0315095  | 13.4510772 |
| O  | 2.7623905  | 9.2201275  | 14.2478261 |
| C  | 1.6556330  | 9.6635185  | 13.7944453 |
| C  | 1.5663439  | 11.1535965 | 13.6129573 |
| C  | 0.4094954  | 11.7141819 | 13.0553262 |

|    |            |            |            |
|----|------------|------------|------------|
| C  | 2.6270911  | 11.9921001 | 13.9781109 |
| C  | 0.3200698  | 13.0792082 | 12.8422086 |
| H  | -0.4143822 | 11.0433361 | 12.7867020 |
| C  | 2.5466814  | 13.3624445 | 13.7716054 |
| H  | 3.5193604  | 11.5368506 | 14.4243983 |
| C  | 1.3940362  | 13.9311754 | 13.1858679 |
| H  | -0.5825675 | 13.5114976 | 12.3923488 |
| H  | 3.3826529  | 14.0165962 | 14.0494085 |
| C  | 1.2949321  | 15.3095232 | 12.9096535 |
| C  | 1.1461787  | 16.4898070 | 12.6038620 |
| C  | 0.9320420  | 17.8184087 | 12.1928338 |
| C  | 1.9449876  | 18.7739525 | 12.4609753 |
| C  | -0.2917496 | 18.0972662 | 11.5290255 |
| C  | -2.3414825 | 17.7828544 | 10.6531688 |
| C  | 3.0772908  | 20.6594448 | 12.5668950 |
| C  | 3.8637165  | 19.6567208 | 13.2373487 |
| C  | 3.1618269  | 18.4884174 | 13.1683074 |
| N  | 1.9100586  | 20.0946772 | 12.1009266 |
| C  | -1.9086294 | 19.1421659 | 10.4613054 |
| N  | -0.6557034 | 19.3101763 | 11.0090481 |
| C  | -2.6480931 | 20.1286661 | 9.7898537  |
| C  | 3.4623263  | 21.9999505 | 12.3996540 |
| C  | -2.2155837 | 21.4392116 | 9.5330092  |
| C  | 2.7301638  | 22.9825764 | 11.7132095 |
| H  | -3.2969885 | 17.3756148 | 10.3144907 |
| H  | 3.4345254  | 17.5066187 | 13.5622301 |
| H  | 4.8375901  | 19.8302207 | 13.7012374 |
| C  | -1.3354292 | 17.1343491 | 11.3080077 |
| H  | -1.2949904 | 16.0889328 | 11.6207939 |
| N  | -1.0112276 | 21.9764137 | 9.9263426  |
| N  | 1.5125359  | 22.7907909 | 11.1022004 |
| C  | 1.1655547  | 23.9886709 | 10.5307728 |
| C  | -0.0025332 | 24.2216167 | 9.7867596  |
| C  | 2.1848824  | 24.9707378 | 10.7911184 |
| C  | 3.1502910  | 24.3491094 | 11.5304344 |
| Zn | 0.4408553  | 21.0403751 | 11.0323785 |
| C  | -2.9887033 | 22.4401668 | 8.8433756  |
| C  | -1.0148545 | 23.2857388 | 9.5176872  |
| C  | -2.2437087 | 23.5830827 | 8.8295074  |
| H  | -3.9852942 | 22.2815382 | 8.4246623  |
| H  | -2.5041096 | 24.5507008 | 8.3951047  |
| H  | 4.0757068  | 24.7771975 | 11.9227793 |
| C  | 4.7622978  | 22.4153449 | 13.0018898 |
| C  | 4.8328749  | 22.6913417 | 14.3693349 |
| C  | 5.9010860  | 22.5389120 | 12.2040661 |
| C  | 6.0441674  | 23.1024549 | 14.9333594 |
| H  | 3.9481693  | 22.6065768 | 15.0102732 |
| C  | 7.1156109  | 22.9305760 | 12.7782753 |
| H  | 5.8669561  | 22.3215460 | 11.1306958 |
| C  | 7.1974048  | 23.2232016 | 14.1464500 |
| H  | 8.1450392  | 23.5247075 | 14.5999289 |
| C  | -4.0237563 | 19.7630812 | 9.3411303  |
| C  | -4.2679278 | 19.3904914 | 8.0181315  |
| C  | -5.0710193 | 19.8059996 | 10.2641146 |
| C  | -5.5667814 | 19.0527841 | 7.6222565  |
| H  | -3.4576285 | 19.3442355 | 7.2817133  |
| C  | -6.3690274 | 19.4833148 | 9.8585068  |
| H  | -4.8976973 | 20.1010641 | 11.3051923 |
| C  | -6.6283106 | 19.0991386 | 8.5365610  |
| H  | -7.6417869 | 18.8379984 | 8.2242720  |
| H  | 2.1565436  | 26.0099003 | 10.4557210 |

|   |            |            |            |
|---|------------|------------|------------|
| O | 8.1718450  | 22.9977551 | 11.9214847 |
| O | 6.0075563  | 23.3659991 | 16.2684303 |
| O | -5.7101218 | 18.6918576 | 6.3169220  |
| O | -7.3244551 | 19.5753110 | 10.8247460 |
| C | 9.4647734  | 23.3000255 | 12.4373701 |
| H | 9.7136215  | 22.6037093 | 13.2669597 |
| H | 9.4786711  | 24.3324083 | 12.8468825 |
| C | 10.4547575 | 23.1497294 | 11.3035365 |
| H | 11.4421726 | 23.5014566 | 11.6618959 |
| H | 10.1590300 | 23.8377556 | 10.4872958 |
| C | 10.5593913 | 21.7265123 | 10.7738032 |
| H | 10.8942075 | 21.0559998 | 11.5923396 |
| H | 9.5466823  | 21.3755231 | 10.4972268 |
| C | 11.4929575 | 21.5786548 | 9.5821410  |
| H | 12.5039478 | 21.9514447 | 9.8498579  |
| H | 11.1441581 | 22.2387747 | 8.7610110  |
| C | 11.6002773 | 20.1496176 | 9.0696042  |
| H | 11.9733829 | 19.4952092 | 9.8845342  |
| H | 10.5847594 | 19.7706393 | 8.8332253  |
| C | 12.4930452 | 19.9918054 | 7.8475202  |
| H | 12.1092133 | 20.6349359 | 7.0279920  |
| H | 13.5066474 | 20.3830207 | 8.0768518  |
| C | 12.6076440 | 18.5571606 | 7.3502687  |
| H | 13.0017460 | 17.9203785 | 8.1680570  |
| H | 11.5923813 | 18.1654156 | 7.1380324  |
| C | 13.4826223 | 18.4072666 | 6.1164071  |
| H | 13.5466691 | 17.3558070 | 5.7831696  |
| H | 13.0885195 | 19.0002464 | 5.2693237  |
| H | 14.5143696 | 18.7587393 | 6.3077202  |
| C | 7.0417414  | 24.1524611 | 16.8579334 |
| H | 7.9350323  | 23.5185711 | 17.0421725 |
| H | 7.3433085  | 24.9658922 | 16.1640238 |
| C | 6.5087408  | 24.7288906 | 18.1546674 |
| H | 6.0479332  | 23.9012103 | 18.7285513 |
| H | 7.3768408  | 25.0699961 | 18.7506488 |
| C | 5.5209244  | 25.8847283 | 18.0002146 |
| H | 6.0342631  | 26.7307533 | 17.4963980 |
| H | 5.2655462  | 26.2602601 | 19.0120611 |
| C | 4.2353380  | 25.5655742 | 17.2471014 |
| H | 4.4806122  | 25.2499824 | 16.2178919 |
| H | 3.7473646  | 24.6829621 | 17.7096409 |
| C | 3.2506122  | 26.7250414 | 17.2025194 |
| H | 3.7444040  | 27.6071263 | 16.7422948 |
| H | 3.0023691  | 27.0324537 | 18.2389331 |
| C | 1.9595918  | 26.4242025 | 16.4459408 |
| H | 1.4589050  | 25.5498174 | 16.9123504 |
| H | 1.2581112  | 27.2718195 | 16.5826931 |
| C | 2.1226454  | 26.1651693 | 14.9513351 |
| H | 2.6633188  | 27.0197437 | 14.4933568 |
| H | 2.7720476  | 25.2832432 | 14.7836453 |
| C | 0.8010109  | 25.9564214 | 14.2330901 |
| H | 0.9445244  | 25.7781090 | 13.1534902 |
| H | 0.2535196  | 25.0852059 | 14.6411593 |
| H | 0.1402806  | 26.8377919 | 14.3351426 |
| C | -6.9787000 | 18.2173581 | 5.8735497  |
| H | -7.2996003 | 17.3602230 | 6.5048745  |
| H | -7.7424624 | 19.0172167 | 5.9775411  |
| C | -6.8392305 | 17.7955529 | 4.4284086  |
| H | -7.8457519 | 17.5068598 | 4.0658280  |
| H | -6.5420131 | 18.6804623 | 3.8370630  |
| C | -5.8615081 | 16.6428755 | 4.2242327  |

|   |             |            |            |
|---|-------------|------------|------------|
| H | -4.8530024  | 16.9615689 | 4.5516683  |
| H | -6.1507011  | 15.8305736 | 4.9213448  |
| C | -5.7888798  | 16.0591392 | 2.8120909  |
| H | -5.3699569  | 15.0383883 | 2.8938976  |
| H | -6.8186219  | 15.9209675 | 2.4193237  |
| C | -4.9512618  | 16.8106625 | 1.7769069  |
| H | -4.8441542  | 16.1474957 | 0.8962070  |
| H | -3.9221428  | 16.9431024 | 2.1703760  |
| C | -5.4824552  | 18.1632072 | 1.3118588  |
| H | -6.5548368  | 18.0621247 | 1.0403147  |
| H | -5.4538936  | 18.8823714 | 2.1517897  |
| C | -4.7224875  | 18.7717004 | 0.1335101  |
| H | -5.0636757  | 19.8161377 | -0.0046057 |
| H | -3.6471581  | 18.8450692 | 0.3956018  |
| C | -4.8777144  | 18.0229417 | -1.1825150 |
| H | -4.3439826  | 18.5338875 | -2.0043857 |
| H | -4.4778965  | 16.9938093 | -1.1282482 |
| H | -5.9424824  | 17.9454857 | -1.4759510 |
| C | -8.6880177  | 19.3904928 | 10.4650795 |
| H | -8.9589818  | 20.0744760 | 9.6317349  |
| H | -8.8585085  | 18.3512908 | 10.1083356 |
| C | -9.5234520  | 19.6867744 | 11.6894153 |
| H | -9.2334822  | 18.9866252 | 12.4962992 |
| H | -9.2543660  | 20.6977955 | 12.0516916 |
| C | -11.0207388 | 19.6077651 | 11.4325837 |
| H | -11.2892429 | 18.5935813 | 11.0715750 |
| H | -11.2919502 | 20.2979837 | 10.6067608 |
| C | -11.8558029 | 19.9455325 | 12.6592962 |
| H | -11.6052239 | 19.2405715 | 13.4782385 |
| H | -11.5593526 | 20.9469441 | 13.0338991 |
| C | -13.3576987 | 19.9269079 | 12.4157436 |
| H | -13.6038332 | 20.6276929 | 11.5908781 |
| H | -13.6616708 | 18.9241647 | 12.0503582 |
| C | -14.1794745 | 20.2886867 | 13.6440132 |
| H | -13.9440297 | 19.5795017 | 14.4647431 |
| H | -13.8587254 | 21.2838734 | 14.0168749 |
| C | -15.6832295 | 20.3034981 | 13.4067339 |
| H | -15.9137535 | 21.0109642 | 12.5842262 |
| H | -16.0039104 | 19.3085062 | 13.0370391 |
| C | -16.4871781 | 20.6748058 | 14.6418014 |
| H | -17.5735542 | 20.6846015 | 14.4403594 |
| H | -16.3088054 | 19.9608028 | 15.4679558 |
| H | -16.2096820 | 21.6788350 | 15.0150718 |
| N | -0.1955262  | 25.5443602 | 9.2762229  |
| C | 0.0034421   | 25.7592855 | 7.8967555  |
| C | -0.8129212  | 26.6354958 | 7.1597947  |
| C | 1.0035627   | 25.0510466 | 7.2127353  |
| C | -0.6086930  | 26.8090703 | 5.7965357  |
| H | -1.6232827  | 27.1744500 | 7.6650848  |
| C | 1.1827741   | 25.2260774 | 5.8446799  |
| H | 1.6430767   | 24.3542028 | 7.7669378  |
| C | 0.3921747   | 26.1128345 | 5.1039977  |
| H | -1.2668752  | 27.4956835 | 5.2442015  |
| H | 1.9732998   | 24.6564761 | 5.3360801  |
| C | -0.6609164  | 26.5459822 | 10.1487421 |
| C | -0.3446587  | 27.9008834 | 9.9479131  |
| C | -1.4307783  | 26.2060832 | 11.2741033 |
| C | -0.8240645  | 28.8739916 | 10.8180705 |
| H | 0.2845663   | 28.1902480 | 9.0979420  |
| C | -1.8843192  | 27.1912470 | 12.1427383 |
| H | -1.6698544  | 25.1544261 | 11.4678941 |

|   |            |            |            |
|---|------------|------------|------------|
| C | -1.6069956 | 28.5471695 | 11.9326365 |
| H | -0.5675502 | 29.9268598 | 10.6312675 |
| H | -2.4813287 | 26.8900326 | 13.0153087 |
| C | 0.6288722  | 26.3521885 | 3.6384068  |
| H | 1.1294710  | 25.4688508 | 3.1973791  |
| H | -0.3444447 | 26.4459400 | 3.1208253  |
| C | 1.4653440  | 27.6032030 | 3.3383562  |
| H | 1.4856450  | 27.7636381 | 2.2413299  |
| H | 0.9518456  | 28.4903018 | 3.7629686  |
| C | 2.8913989  | 27.5477527 | 3.8650517  |
| H | 2.8737909  | 27.3890246 | 4.9623175  |
| H | 3.3938950  | 26.6530949 | 3.4438956  |
| C | 3.7014491  | 28.7992022 | 3.5513442  |
| H | 3.1533108  | 29.6823503 | 3.9372258  |
| H | 3.7501368  | 28.9395141 | 2.4506595  |
| C | 5.1173559  | 28.8098763 | 4.1225901  |
| H | 5.0613399  | 28.6987535 | 5.2244394  |
| H | 5.5628769  | 29.8088886 | 3.9476426  |
| C | 6.0429264  | 27.7451339 | 3.5520674  |
| H | 5.6910663  | 26.7223139 | 3.7803644  |
| H | 6.1193795  | 27.8274921 | 2.4506455  |
| H | 7.0649572  | 27.8347365 | 3.9626448  |
| C | -2.1840835 | 29.6034722 | 12.8319180 |
| H | -1.5849915 | 30.5309145 | 12.7536045 |
| H | -2.1078119 | 29.2774040 | 13.8883393 |
| C | -3.6474668 | 29.9178527 | 12.5140136 |
| H | -3.7250639 | 30.2383679 | 11.4553851 |
| H | -4.2363304 | 28.9808215 | 12.5785892 |
| C | -4.2698515 | 30.9718938 | 13.4169132 |
| H | -3.6948021 | 31.9174203 | 13.3351238 |
| H | -4.1671715 | 30.6567073 | 14.4762059 |
| C | -5.7360707 | 31.2410526 | 13.1106796 |
| H | -5.8381384 | 31.5506611 | 12.0494255 |
| H | -6.3045282 | 30.2914710 | 13.1927811 |
| C | -6.3811017 | 32.2907597 | 14.0048428 |
| H | -5.8194266 | 33.2424762 | 13.9135315 |
| H | -6.2685650 | 31.9840589 | 15.0646943 |
| C | -7.8498623 | 32.5289359 | 13.6939570 |
| H | -8.2946378 | 33.2934900 | 14.3563333 |
| H | -7.9903266 | 32.8704200 | 12.6508812 |
| H | -8.4405945 | 31.6012929 | 13.8130952 |

**Table S17. YD2-o-C8-TiO2 (solv)**

283

|    |            |           |            |
|----|------------|-----------|------------|
| Ti | 7.8633895  | 5.3962343 | 14.2455952 |
| Ti | 4.3243172  | 5.1736184 | 12.9235313 |
| Ti | 0.7852422  | 4.9511021 | 11.6014578 |
| Ti | -2.7538300 | 4.7284862 | 10.2793939 |
| O  | 7.1643089  | 5.5481449 | 16.0914262 |
| O  | 3.6252339  | 5.3256285 | 14.7693527 |
| O  | 0.0861616  | 5.1030126 | 13.4472889 |
| O  | -3.4529107 | 4.8803967 | 12.1252250 |
| O  | 6.2348045  | 5.2542881 | 13.2125448 |
| O  | 2.6956360  | 5.0317658 | 11.8904364 |
| O  | -0.8434362 | 4.8091499 | 10.5683725 |
| O  | -4.3825112 | 4.5866335 | 9.2462990  |
| Ti | 3.4678864  | 9.5992735 | 19.8878385 |
| Ti | -0.0712793 | 9.3766517 | 18.5657397 |
| Ti | -3.6103543 | 9.1541353 | 17.2436662 |

|    |            |            |            |
|----|------------|------------|------------|
| Ti | -7.1494266 | 8.9315194  | 15.9216024 |
| Ti | 4.3608377  | 7.5333287  | 17.8451771 |
| Ti | 0.8216692  | 7.3108063  | 16.5230686 |
| Ti | -2.7174031 | 7.0881904  | 15.2010047 |
| Ti | -6.2564781 | 6.8656740  | 13.8789312 |
| Ti | 3.4312371  | 7.2395654  | 14.9662511 |
| Ti | 6.9703121  | 7.4620818  | 16.2883246 |
| Ti | -0.1078351 | 7.0169495  | 13.6441872 |
| Ti | -3.6469101 | 6.7944332  | 12.3221137 |
| O  | 4.1669317  | 9.4473711  | 18.0421007 |
| O  | 0.6277660  | 9.2247492  | 16.7200019 |
| O  | -2.9113063 | 9.0021333  | 15.3979380 |
| O  | -6.4503813 | 8.7796169  | 14.0758645 |
| O  | 5.0964388  | 9.7411283  | 20.9209917 |
| O  | 1.5573638  | 9.5186119  | 19.5989182 |
| O  | -1.9817085 | 9.2959961  | 18.2768544 |
| O  | -5.5207834 | 9.0734797  | 16.9547808 |
| O  | -9.0598557 | 8.8508638  | 15.6327170 |
| O  | 5.0599183  | 7.3814181  | 15.9993460 |
| O  | 1.5207498  | 7.1588958  | 14.6772375 |
| O  | -2.0183224 | 6.9362799  | 13.3551737 |
| O  | -5.5573974 | 6.7137635  | 12.0331002 |
| O  | 3.6617897  | 7.6853306  | 19.6909053 |
| O  | 0.1226239  | 7.4627088  | 18.3688065 |
| O  | -3.4164484 | 7.2400929  | 17.0467426 |
| O  | -6.9555233 | 7.0175765  | 15.7246691 |
| O  | 2.7321918  | 7.3914679  | 16.8119889 |
| O  | 6.2712668  | 7.6139843  | 18.1340624 |
| O  | -0.8068804 | 7.1688520  | 15.4899251 |
| O  | -4.3459554 | 6.9463356  | 14.1678515 |
| O  | 7.6693574  | 7.3101794  | 14.4425867 |
| O  | 4.1302824  | 7.0876630  | 13.1205132 |
| O  | 0.5912102  | 6.8650471  | 11.7984493 |
| O  | -2.9478621 | 6.6424312  | 10.4763855 |
| H  | 6.0448758  | 9.7811735  | 21.0644459 |
| H  | -9.8683787 | 8.7804536  | 15.1198318 |
| O  | 9.7737833  | 5.4768980  | 14.5345738 |
| H  | 10.5821775 | 5.5473103  | 15.0475172 |
| H  | -5.3308901 | 4.5466024  | 9.1029730  |
| O  | 0.6100006  | 9.0362886  | 13.4472635 |
| O  | 2.7730361  | 9.2062495  | 14.2469376 |
| C  | 1.6555494  | 9.6711354  | 13.8318870 |
| C  | 1.5523011  | 11.1622679 | 13.7446448 |
| C  | 0.3561737  | 11.7550284 | 13.3144662 |
| C  | 2.6442705  | 11.9807269 | 14.0651856 |
| C  | 0.2601258  | 13.1298171 | 13.1729054 |
| H  | -0.4989009 | 11.1085383 | 13.0849544 |
| C  | 2.5603736  | 13.3593913 | 13.9260481 |
| H  | 3.5703032  | 11.5105186 | 14.4175620 |
| C  | 1.3696363  | 13.9588898 | 13.4575763 |
| H  | -0.6751800 | 13.5848755 | 12.8234421 |
| H  | 3.4245703  | 13.9930843 | 14.1614577 |
| C  | 1.2762154  | 15.3471000 | 13.2312579 |
| C  | 1.1504224  | 16.5369280 | 12.9558690 |
| C  | 0.9733502  | 17.8813994 | 12.5756445 |
| C  | 2.0297216  | 18.7903221 | 12.8379113 |
| C  | -0.2506370 | 18.2110426 | 11.9347515 |
| C  | -2.3079606 | 17.9669072 | 11.0513129 |
| C  | 3.2472036  | 20.6223033 | 12.9166722 |
| C  | 3.9968126  | 19.5915835 | 13.5864607 |
| C  | 3.2442175  | 18.4534618 | 13.5316011 |

|    |            |            |            |
|----|------------|------------|------------|
| N  | 2.0464848  | 20.1084240 | 12.4727825 |
| C  | -1.8534186 | 19.3264082 | 10.9127203 |
| N  | -0.5925382 | 19.4488065 | 11.4606471 |
| C  | -2.5821642 | 20.3555259 | 10.2961970 |
| C  | 3.6888916  | 21.9375752 | 12.7264450 |
| C  | -2.1347918 | 21.6774114 | 10.1138457 |
| C  | 2.9834895  | 22.9491287 | 12.0489269 |
| H  | -3.2699467 | 17.5857462 | 10.7003712 |
| H  | 3.4842079  | 17.4639936 | 13.9292216 |
| H  | 4.9835800  | 19.7257598 | 14.0374304 |
| C  | -1.3148239 | 17.2768787 | 11.6845452 |
| H  | -1.2997557 | 16.2194739 | 11.9589750 |
| N  | -0.8915097 | 22.1586237 | 10.4537342 |
| N  | 1.7201669  | 22.8329131 | 11.5189072 |
| C  | 1.4133157  | 24.0506309 | 10.9631189 |
| C  | 0.1902925  | 24.3758903 | 10.3465556 |
| C  | 2.5200661  | 24.9554105 | 11.1256121 |
| C  | 3.4870764  | 24.2772783 | 11.8090521 |
| Zn | 0.5836013  | 21.1283631 | 11.4510097 |
| C  | -2.9357202 | 22.7464281 | 9.5745055  |
| C  | -0.8912376 | 23.4959880 | 10.1450806 |
| C  | -2.1673508 | 23.8750756 | 9.6003893  |
| H  | -3.9688209 | 22.6483695 | 9.2322267  |
| H  | -2.4456964 | 24.8809036 | 9.2780338  |
| H  | 4.4655341  | 24.6456265 | 12.1254585 |
| C  | 4.9918058  | 22.3489201 | 13.3275467 |
| C  | 4.9835443  | 22.8810072 | 14.6196854 |
| C  | 6.1717773  | 22.3270660 | 12.5842370 |
| C  | 6.1471474  | 23.4496073 | 15.1434433 |
| H  | 4.0602577  | 22.9146855 | 15.2086901 |
| C  | 7.3470861  | 22.8653665 | 13.1297920 |
| H  | 6.1937581  | 21.9242352 | 11.5648171 |
| C  | 7.3397174  | 23.4443521 | 14.4067600 |
| H  | 8.2478966  | 23.8758468 | 14.8365590 |
| C  | -3.9410747 | 20.0236438 | 9.7797011  |
| C  | -4.1383188 | 19.8930506 | 8.4028527  |
| C  | -5.0093603 | 19.8498987 | 10.6634477 |
| C  | -5.4105156 | 19.5803575 | 7.9099279  |
| H  | -3.3094743 | 20.0210185 | 7.6968072  |
| C  | -6.2830021 | 19.5522839 | 10.1623438 |
| H  | -4.8735531 | 19.9549660 | 11.7462004 |
| C  | -6.4936591 | 19.4116187 | 8.7833534  |
| H  | -7.4863420 | 19.1764144 | 8.3934206  |
| H  | 2.5512236  | 25.9893470 | 10.7766245 |
| O  | 8.4471300  | 22.7967442 | 12.3343212 |
| O  | 6.0329105  | 24.0062313 | 16.3808928 |
| O  | -5.5004963 | 19.4613839 | 6.5597231  |
| O  | -7.2655416 | 19.4214431 | 11.0941523 |
| C  | 9.6737414  | 23.3702384 | 12.8045120 |
| H  | 9.9714181  | 22.8851322 | 13.7574502 |
| H  | 9.5262165  | 24.4511245 | 13.0031019 |
| C  | 10.7245982 | 23.1541543 | 11.7413724 |
| H  | 11.6314301 | 23.7074158 | 12.0547724 |
| H  | 10.3806914 | 23.6312138 | 10.8024013 |
| C  | 11.0647779 | 21.6920632 | 11.4910110 |
| H  | 11.4185031 | 21.2335953 | 12.4377165 |
| H  | 10.1394825 | 21.1468053 | 11.2196430 |
| C  | 12.1135454 | 21.4903789 | 10.4077083 |
| H  | 13.0298466 | 22.0591252 | 10.6722498 |
| H  | 11.7510930 | 21.9385584 | 9.4594579  |
| C  | 12.4782675 | 20.0322895 | 10.1693200 |



|   |            |            |            |
|---|------------|------------|------------|
| H | 12.8422513 | 19.5863722 | 11.1182112 |
| H | 11.5614999 | 19.4635187 | 9.9079844  |
| C | 13.5249014 | 19.8280941 | 9.0837026  |
| H | 13.1576365 | 20.2685840 | 8.1331878  |
| H | 14.4386928 | 20.4040849 | 9.3422668  |
| C | 13.8998227 | 18.3709065 | 8.8503074  |
| H | 14.2674761 | 17.9344100 | 9.8012080  |
| H | 12.9851749 | 17.7972489 | 8.5957095  |
| C | 14.9435563 | 18.1797129 | 7.7616072  |
| H | 15.1961666 | 17.1137243 | 7.6161528  |
| H | 14.5875376 | 18.5733274 | 6.7905257  |
| H | 15.8819197 | 18.7136598 | 8.0060181  |
| C | 6.8485059  | 25.1472946 | 16.6992452 |
| H | 7.8117661  | 24.8040225 | 17.1272946 |
| H | 7.0708346  | 25.7126720 | 15.7713011 |
| C | 6.1028353  | 26.0199913 | 17.6871909 |
| H | 5.8053556  | 25.3957314 | 18.5531483 |
| H | 6.8363170  | 26.7513996 | 18.0773504 |
| C | 4.8889240  | 26.7715358 | 17.1380383 |
| H | 5.2011756  | 27.3681021 | 16.2553206 |
| H | 4.5734638  | 27.5146535 | 17.8978647 |
| C | 3.6872649  | 25.9082507 | 16.7688850 |
| H | 3.9700301  | 25.2127992 | 15.9611795 |
| H | 3.4314191  | 25.2615634 | 17.6343388 |
| C | 2.4503019  | 26.6961822 | 16.3559163 |
| H | 2.6743801  | 27.2952994 | 15.4481924 |
| H | 2.2082611  | 27.4338072 | 17.1474786 |
| C | 1.2212125  | 25.8264464 | 16.0953785 |
| H | 1.0152539  | 25.2148908 | 16.9993911 |
| H | 0.3341552  | 26.4800280 | 15.9721215 |
| C | 1.3196620  | 24.9114803 | 14.8808330 |
| H | 1.4596312  | 25.5282199 | 13.9715547 |
| H | 2.2296743  | 24.2854826 | 14.9492492 |
| C | 0.1097922  | 24.0083041 | 14.7038459 |
| H | 0.1978435  | 23.3962076 | 13.7875695 |
| H | -0.0106045 | 23.3182088 | 15.5608208 |
| H | -0.8257304 | 24.5942527 | 14.6242580 |
| C | -6.7579539 | 19.1111787 | 5.9656746  |
| H | -7.1322896 | 18.1658394 | 6.4103840  |
| H | -7.5020327 | 19.9066674 | 6.1724306  |
| C | -6.5130686 | 18.9567901 | 4.4830153  |
| H | -7.4923915 | 18.8635018 | 3.9765516  |
| H | -6.0699596 | 19.8996843 | 4.1130433  |
| C | -5.6222222 | 17.7635903 | 4.1371807  |
| H | -4.8164643 | 17.6859195 | 4.8940911  |
| H | -6.2220807 | 16.8397961 | 4.2483222  |
| C | -4.9907203 | 17.8172438 | 2.7409846  |
| H | -4.9320226 | 16.7934236 | 2.3269440  |
| H | -5.6602694 | 18.3745785 | 2.0533177  |
| C | -3.5855629 | 18.4197287 | 2.6910914  |
| H | -3.2189255 | 18.3596940 | 1.6472964  |
| H | -2.9033899 | 17.7727694 | 3.2826947  |
| C | -3.4522305 | 19.8512302 | 3.1994320  |
| H | -4.1371381 | 20.5119713 | 2.6260645  |
| H | -3.7959035 | 19.8990118 | 4.2508200  |
| C | -2.0347188 | 20.4177146 | 3.1313963  |
| H | -2.0176372 | 21.3876409 | 3.6654931  |
| H | -1.3547748 | 19.7532032 | 3.7033583  |
| C | -1.4887072 | 20.6155813 | 1.7242808  |
| H | -0.4807051 | 21.0687604 | 1.7422876  |
| H | -1.4072802 | 19.6618398 | 1.1707230  |

|   |             |            |            |
|---|-------------|------------|------------|
| H | -2.1428459  | 21.2843710 | 1.1316695  |
| C | -8.5969349  | 19.1407092 | 10.6514571 |
| H | -8.9316664  | 19.9259243 | 9.9418207  |
| H | -8.6188157  | 18.1700312 | 10.1135153 |
| C | -9.4932217  | 19.1045093 | 11.8670409 |
| H | -9.1103297  | 18.3419058 | 12.5726533 |
| H | -9.4202844  | 20.0777266 | 12.3899747 |
| C | -10.9430707 | 18.8095417 | 11.5108649 |
| H | -11.0072326 | 17.8259045 | 11.0022350 |
| H | -11.2995514 | 19.5523815 | 10.7676535 |
| C | -11.8779602 | 18.8182483 | 12.7122264 |
| H | -11.5220087 | 18.0811890 | 13.4611173 |
| H | -11.8160927 | 19.8052254 | 13.2151466 |
| C | -13.3283115 | 18.5220985 | 12.3590210 |
| H | -13.6724963 | 19.2460241 | 11.5912803 |
| H | -13.3919791 | 17.5258026 | 11.8742664 |
| C | -14.2764531 | 18.5658657 | 13.5488207 |
| H | -13.9346409 | 17.8431726 | 14.3190236 |
| H | -14.2121760 | 19.5635324 | 14.0314806 |
| C | -15.7275127 | 18.2731445 | 13.1914611 |
| H | -16.0601104 | 18.9905085 | 12.4136178 |
| H | -15.7889334 | 17.2730653 | 12.7158710 |
| C | -16.6726153 | 18.3339516 | 14.3808524 |
| H | -17.7162113 | 18.1176270 | 14.0879775 |
| H | -16.3866262 | 17.6012148 | 15.1591936 |
| H | -16.6598367 | 19.3346161 | 14.8533416 |
| N | 0.0229182   | 25.7213742 | 9.9124673  |
| C | -0.0905151  | 25.9928238 | 8.5341473  |
| C | -0.8905025  | 27.0472373 | 8.0609588  |
| C | 0.5657099   | 25.1790607 | 7.5980381  |
| C | -1.0166763  | 27.2734879 | 6.6954853  |
| H | -1.4300254  | 27.6826391 | 8.7739292  |
| C | 0.4141554   | 25.4107160 | 6.2340543  |
| H | 1.1967004   | 24.3523062 | 7.9478547  |
| C | -0.3749470  | 26.4609655 | 5.7481842  |
| H | -1.6568994  | 28.0994980 | 6.3527152  |
| H | 0.9355974   | 24.7547664 | 5.5227758  |
| C | -0.0279149  | 26.7398203 | 10.8908924 |
| C | 0.5894725   | 27.9845755 | 10.6888873 |
| C | -0.6554162  | 26.4926493 | 12.1201934 |
| C | 0.5910582   | 28.9370506 | 11.7027044 |
| H | 1.0929759   | 28.1939829 | 9.7369670  |
| C | -0.6332774  | 27.4508294 | 13.1269100 |
| H | -1.1423880  | 25.5254440 | 12.2917033 |
| C | -0.0026492  | 28.6886993 | 12.9489715 |
| H | 1.0967409   | 29.8979661 | 11.5296963 |
| H | -1.1170426  | 27.2234376 | 14.0870612 |
| C | -0.5039055  | 26.7423725 | 4.2764174  |
| H | -0.2559111  | 25.8275850 | 3.7046899  |
| H | -1.5588026  | 26.9805113 | 4.0424178  |
| C | 0.3775463   | 27.8964809 | 3.7826388  |
| H | 0.1224800   | 28.1082771 | 2.7249971  |
| H | 0.1164288   | 28.8168410 | 4.3449181  |
| C | 1.8728404   | 27.6400918 | 3.8978309  |
| H | 2.1327342   | 27.4281473 | 4.9552931  |
| H | 2.1217933   | 26.7145383 | 3.3398152  |
| C | 2.7231425   | 28.7996195 | 3.3948584  |
| H | 2.4260311   | 29.7190470 | 3.9387978  |
| H | 2.4818991   | 28.9949400 | 2.3284411  |
| C | 4.2305824   | 28.6040375 | 3.5408217  |
| H | 4.4696761   | 28.4325689 | 4.6103972  |

|   |            |            |            |
|---|------------|------------|------------|
| H | 4.7374722  | 29.5510840 | 3.2707152  |
| C | 4.8099527  | 27.4729545 | 2.7030623  |
| H | 4.3992512  | 26.4882413 | 2.9931439  |
| H | 4.5894831  | 27.6174800 | 1.6274865  |
| H | 5.9082455  | 27.4118600 | 2.8110346  |
| C | -0.0027849 | 29.7206418 | 14.0399828 |
| H | 0.8739719  | 30.3855455 | 13.9204829 |
| H | 0.1202691  | 29.2185886 | 15.0199082 |
| C | -1.2747704 | 30.5701962 | 14.0734148 |
| H | -1.3993203 | 31.0738247 | 13.0931413 |
| H | -2.1535111 | 29.9021998 | 14.1792354 |
| C | -1.2838221 | 31.6056086 | 15.1876546 |
| H | -0.3993755 | 32.2671128 | 15.0800467 |
| H | -1.1529201 | 31.0935471 | 16.1636734 |
| C | -2.5468479 | 32.4532402 | 15.2274684 |
| H | -2.6755275 | 32.9659934 | 14.2511894 |
| H | -3.4306947 | 31.7897903 | 15.3311461 |
| C | -2.5617352 | 33.4875536 | 16.3446671 |
| H | -1.6772315 | 34.1480887 | 16.2381375 |
| H | -2.4299972 | 32.9718008 | 17.3177300 |
| C | -3.8279352 | 34.3279874 | 16.3784151 |
| H | -3.8079892 | 35.0686961 | 17.1985936 |
| H | -3.9675196 | 34.8836072 | 15.4314769 |
| H | -4.7253777 | 33.6966417 | 16.5217937 |
